# Supplementary material for: Neutralizing human monoclonal antibodies that target the PcrV component of the type III secretion system of Pseudomonas aeruginosa act through distinct mechanisms
Source: eLife. 2026 Feb 17;14:RP105195. doi: 10.7554/eLife.105195 (PMC12912723; doi:10.7554/eLife.105195)
Supplement: Figure 1—source data 1. [file elife-105195-fig1-data1.xlsx]

## Sheet: Fig_1B
	OD (405nm)
Patient serum	PcrV	PscF
1	0.2194	0.4735
2	0.18975	0.41135
3	0.21635	0.56835
4	0.173	0.4581
5	0.3717	0.47605
6	0.5561	0.49365
7	0.28015	0.4028
8	0.3427	0.4045
9	0.17715	0.3862
10	0.20805	0.3814
11	0.3088	0.46295
12	0.68965	0.34425
13	0.45375	0.4607
14	0.6177	0.3309
15	0.2561	0.44565
16	1.3337	1.15815
17	0.5169	0.86925
18	0.2089	0.4813
19	0.33045	0.38175
20	0.4175	0.6169
21	0.3498	0.53345
22	0.3413	0.37565
23	0.46635	0.77905
24	0.24805	0.37155
25	1.48625	0.92065
26	0.46565	0.357
27	0.41665	0.6267
28	0.2818	0.3575
29	0.39165	0.66025
30	0.19345	0.4707
31	0.35545	0.3591
32	0.20555	0.72595
33	0.15395	0.67985
34	0.35655	0.48265

## Sheet: Fig_1C
Experiment	IgGs	Concentration	Raw_injection	Mean_No_IgG	Mean_Non_infected	Norm_injection
2020-09-10	No_IgGs	0	8.868	8.70667	0.250667	1.01908
2020-09-10	No_IgGs	0	8.908	8.70667	0.250667	1.02381
2020-09-10	No_IgGs	0	8.344	8.70667	0.250667	0.957111
2021-06-21	No_IgGs	0	9.63	9.77	0.464333	0.984955
2021-06-21	No_IgGs	0	9.36	9.77	0.464333	0.955941
2021-06-21	No_IgGs	0	10.32	9.77	0.464333	1.0591
2020-07-23	No_IgGs	0	8.134	8.26667	0.484	0.982954
2020-07-23	No_IgGs	0	8.348	8.26667	0.484	1.01045
2020-07-23	No_IgGs	0	8.318	8.26667	0.484	1.0066
23b/07/2020	No_IgGs	0	7.233	6.946	0.292333	1.04313
23b/07/2020	No_IgGs	0	6.83	6.946	0.292333	0.982566
23b/07/2020	No_IgGs	0	6.775	6.946	0.292333	0.9743
2020-01-30	No_IgGs	0	6.494	6.93767	0.286333	0.933297
2020-01-30	No_IgGs	0	6.998	6.93767	0.286333	1.00907
2020-01-30	No_IgGs	0	7.321	6.93767	0.286333	1.05763
2020-09-10	Control_IgGs	40	8.616	8.70667	0.250667	0.989278
2020-09-10	Control_IgGs	40	8.306	8.70667	0.250667	0.952617
2020-09-10	Control_IgGs	40	8.303	8.70667	0.250667	0.952263
2021-06-21	Control_IgGs	40	8.668	9.77	0.464333	0.881578
2021-06-21	Control_IgGs	40	9.281	9.77	0.464333	0.947451
2021-06-21	Control_IgGs	40	10.626	9.77	0.464333	1.09199
2020-07-23	Control_IgGs	40	8.307	8.26667	0.484	1.00518
2020-07-23	Control_IgGs	40	8.927	8.26667	0.484	1.08485
2020-07-23	Control_IgGs	40	8.681	8.26667	0.484	1.05324
23b/07/2020	Control_IgGs	40	7.308	6.946	0.292333	1.05441
23b/07/2020	Control_IgGs	40	7.407	6.946	0.292333	1.06929
23b/07/2020	Control_IgGs	40	7.691	6.946	0.292333	1.11197
2020-01-30	Control_IgGs	40	7.556	6.93767	0.286333	1.09296
2020-01-30	Control_IgGs	40	7.012	6.93767	0.286333	1.01118
2020-01-30	Control_IgGs	40	7.517	6.93767	0.286333	1.0871
2020-09-10	Donor_16	40	7.859	8.70667	0.250667	0.899756
2020-09-10	Donor_16	40	8.298	8.70667	0.250667	0.951671
2020-09-10	Donor_16	40	7.71	8.70667	0.250667	0.882135
2020-07-23	Donor_16	40	8.133	8.26667	0.484	0.982825
2020-07-23	Donor_16	40	8.114	8.26667	0.484	0.980384
2020-07-23	Donor_16	40	8.036	8.26667	0.484	0.970361
2020-01-30	Donor_16	40	8.644	6.93767	0.286333	1.25654
2020-01-30	Donor_16	40	8.355	6.93767	0.286333	1.21309
2020-01-30	Donor_16	40	8.781	6.93767	0.286333	1.27714
2021-06-21	Donor_25	40	9.136	9.77	0.464333	0.931869
2021-06-21	Donor_25	40	9.199	9.77	0.464333	0.93864
2021-06-21	Donor_25	40	9.304	9.77	0.464333	0.949923
23b/07/2020	Donor_25	40	6.753	6.946	0.292333	0.970993
23b/07/2020	Donor_25	40	6.271	6.946	0.292333	0.898552
23b/07/2020	Donor_25	40	5.443	6.946	0.292333	0.77411
2020-09-10	Control_IgGs	80	8.785	8.70667	0.250667	1.00926
2020-09-10	Control_IgGs	80	8.552	8.70667	0.250667	0.981709
2020-09-10	Control_IgGs	80	8.57	8.70667	0.250667	0.983838
2021-06-21	Control_IgGs	80	9.535	9.77	0.464333	0.974747
2021-06-21	Control_IgGs	80	9.596	9.77	0.464333	0.981302
2021-06-21	Control_IgGs	80	10.561	9.77	0.464333	1.085
2020-07-23	Control_IgGs	80	9.693	8.26667	0.484	1.18327
2020-07-23	Control_IgGs	80	8.288	8.26667	0.484	1.00274
2020-07-23	Control_IgGs	80	8.19	8.26667	0.484	0.990149
23b/07/2020	Control_IgGs	80	7.429	6.946	0.292333	1.07259
23b/07/2020	Control_IgGs	80	8.904	6.946	0.292333	1.29427
23b/07/2020	Control_IgGs	80	6.795	6.946	0.292333	0.977306
2020-01-30	Control_IgGs	80	7.08	6.93767	0.286333	1.0214
2020-01-30	Control_IgGs	80	7.448	6.93767	0.286333	1.07673
2020-01-30	Control_IgGs	80	7.566	6.93767	0.286333	1.09447
2020-09-10	Donor_16	80	2.05	8.70667	0.250667	0.212788
2020-09-10	Donor_16	80	3.277	8.70667	0.250667	0.357892
2020-09-10	Donor_16	80	2.163	8.70667	0.250667	0.226151
2020-07-23	Donor_16	80	6.508	8.26667	0.484	0.774028
2020-07-23	Donor_16	80	6.244	8.26667	0.484	0.740106
2020-07-23	Donor_16	80	6.719	8.26667	0.484	0.801139
2020-01-30	Donor_16	80	7.619	6.93767	0.286333	1.10244
2020-01-30	Donor_16	80	7.174	6.93767	0.286333	1.03553
2020-01-30	Donor_16	80	5.58	6.93767	0.286333	0.795881
2021-06-21	Donor_25	80	5.036	9.77	0.464333	0.491278
2021-06-21	Donor_25	80	5.776	9.77	0.464333	0.570799
2021-06-21	Donor_25	80	7.292	9.77	0.464333	0.733711
23b/07/2020	Donor_25	80	3.3	6.946	0.292333	0.452031
23b/07/2020	Donor_25	80	2.543	6.946	0.292333	0.33826
23b/07/2020	Donor_25	80	3.635	6.946	0.292333	0.50238
2020-09-10	Control_IgGs	160	8.739	8.70667	0.250667	1.00382
2020-09-10	Control_IgGs	160	8.369	8.70667	0.250667	0.960068
2020-09-10	Control_IgGs	160	8.735	8.70667	0.250667	1.00335
2021-06-21	Control_IgGs	160	8.891	9.77	0.464333	0.905541
2021-06-21	Control_IgGs	160	9.717	9.77	0.464333	0.994305
2021-06-21	Control_IgGs	160	11.242	9.77	0.464333	1.15818
2020-07-23	Control_IgGs	160	7.921	8.26667	0.484	0.955585
2020-07-23	Control_IgGs	160	7.615	8.26667	0.484	0.916267
2020-07-23	Control_IgGs	160	7.78	8.26667	0.484	0.937468
23b/07/2020	Control_IgGs	160	6.513	6.946	0.292333	0.934923
23b/07/2020	Control_IgGs	160	7.464	6.946	0.292333	1.07785
23b/07/2020	Control_IgGs	160	9.536	6.946	0.292333	1.38926
2020-01-30	Control_IgGs	160	7.07	6.93767	0.286333	1.0199
2020-01-30	Control_IgGs	160	7.453	6.93767	0.286333	1.07748
2020-01-30	Control_IgGs	160	6.675	6.93767	0.286333	0.960509
2020-09-10	Donor_16	160	0.476	8.70667	0.250667	0.0266477
2020-09-10	Donor_16	160	0.427	8.70667	0.250667	0.020853
2020-09-10	Donor_16	160	0.535	8.70667	0.250667	0.033625
2020-07-23	Donor_16	160	2.752	8.26667	0.484	0.291417
2020-07-23	Donor_16	160	2.242	8.26667	0.484	0.225887
2020-07-23	Donor_16	160	2.426	8.26667	0.484	0.249529
2020-01-30	Donor_16	160	1.787	6.93767	0.286333	0.225619
2020-01-30	Donor_16	160	2.056	6.93767	0.286333	0.266062
2020-01-30	Donor_16	160	2.301	6.93767	0.286333	0.302897
2021-06-21	Donor_25	160	1.278	9.77	0.464333	0.0874378
2021-06-21	Donor_25	160	1.829	9.77	0.464333	0.146649
2021-06-21	Donor_25	160	1.893	9.77	0.464333	0.153527
23b/07/2020	Donor_25	160	1.052	6.946	0.292333	0.114173
23b/07/2020	Donor_25	160	1.222	6.946	0.292333	0.139722
23b/07/2020	Donor_25	160	1.179	6.946	0.292333	0.13326

## Sheet: Fig_1D
Donor 16 - PcrV depletion
IgGs	Concentration	Raw_injection	Mean_No_IgG	Mean_Non_infected	Norm_injection
No_IgG	0	8.134	8.26667	0.484	0.982954
No_IgG	0	8.348	8.26667	0.484	1.01045
No_IgG	0	8.318	8.26667	0.484	1.0066
Control_IgGs	40	8.307	8.26667	0.484	1.00518
Control_IgGs	40	8.927	8.26667	0.484	1.08485
Control_IgGs	40	8.681	8.26667	0.484	1.05324
Donor_16	40	6.141	8.26667	0.484	0.726872
Donor_16	40	6.586	8.26667	0.484	0.78405
Donor_16	40	5.706	8.26667	0.484	0.670978
Donor_16_PcrV_dep	40	6.506	8.26667	0.484	0.773771
Donor_16_PcrV_dep	40	6.229	8.26667	0.484	0.738179
Donor_16_PcrV_dep	40	5.945	8.26667	0.484	0.701688
Control_IgGs	80	9.693	8.26667	0.484	1.18327
Control_IgGs	80	8.288	8.26667	0.484	1.00274
Control_IgGs	80	8.19	8.26667	0.484	0.990149
Donor_16	80	1.639	8.26667	0.484	0.148407
Donor_16	80	1.887	8.26667	0.484	0.180272
Donor_16	80	1.841	8.26667	0.484	0.174362
Donor_16_PcrV_dep	80	1.74	8.26667	0.484	0.161384
Donor_16_PcrV_dep	80	2.084	8.26667	0.484	0.205585
Donor_16_PcrV_dep	80	2.233	8.26667	0.484	0.22473
Control_IgGs	160	7.921	8.26667	0.484	0.955585
Control_IgGs	160	7.615	8.26667	0.484	0.916267
Control_IgGs	160	7.78	8.26667	0.484	0.937468
Donor_16	160	0.765	8.26667	0.484	0.0361059
Donor_16	160	0.766	8.26667	0.484	0.0362344
Donor_16	160	0.918	8.26667	0.484	0.0557649
Donor_16_PcrV_dep	160	0.782	8.26667	0.484	0.0382902
Donor_16_PcrV_dep	160	0.881	8.26667	0.484	0.0510108
Donor_16_PcrV_dep	160	0.801	8.26667	0.484	0.0407315
Donor 16 - PscF depletion
IgGs	Concentration	Raw_injection	Mean_No_IgG	Mean_Non_infected	Norm_injection
No_IgG	0	8.868	8.70667	0.250667	1.01908
No_IgG	0	8.908	8.70667	0.250667	1.02381
No_IgG	0	8.344	8.70667	0.250667	0.957111
Control_IgGs	40	8.616	8.70667	0.250667	0.989278
Control_IgGs	40	8.306	8.70667	0.250667	0.952617
Control_IgGs	40	8.303	8.70667	0.250667	0.952263
Donor_16	40	7.859	8.70667	0.250667	0.899756
Donor_16	40	8.298	8.70667	0.250667	0.951671
Donor_16	40	7.71	8.70667	0.250667	0.882135
Donor_16_PscF_dep	40	8.007	8.70667	0.250667	0.917258
Donor_16_PscF_dep	40	8.006	8.70667	0.250667	0.91714
Donor_16_PscF_dep	40	7.647	8.70667	0.250667	0.874685
Control_IgGs	80	8.785	8.70667	0.250667	1.00926
Control_IgGs	80	8.552	8.70667	0.250667	0.981709
Control_IgGs	80	8.57	8.70667	0.250667	0.983838
Donor_16	80	3.277	8.70667	0.250667	0.357892
Donor_16	80	2.163	8.70667	0.250667	0.226151
Donor_16	80	2.05	8.70667	0.250667	0.212788
Donor_16_PscF_dep	80	8.137	8.70667	0.250667	0.932632
Donor_16_PscF_dep	80	8.104	8.70667	0.250667	0.928729
Donor_16_PscF_dep	80	8.217	8.70667	0.250667	0.942092
Control_IgGs	160	8.739	8.70667	0.250667	1.00382
Control_IgGs	160	8.369	8.70667	0.250667	0.960068
Control_IgGs	160	8.735	8.70667	0.250667	1.00335
Donor_16	160	0.476	8.70667	0.250667	0.0266477
Donor_16	160	0.427	8.70667	0.250667	0.020853
Donor_16	160	0.535	8.70667	0.250667	0.033625
Donor_16_PscF_dep	160	0.688	8.70667	0.250667	0.0517187
Donor_16_PscF_dep	160	0.581	8.70667	0.250667	0.039065
Donor_16_PscF_dep	160	0.591	8.70667	0.250667	0.0402476
Donor 25 - PcrV depletion
IgGs	Concentration	Raw_injection	Mean_No_IgG	Mean_Non_infected	Norm_injection
No_IgG	0	7.233	6.946	0.292333	1.04313
No_IgG	0	6.83	6.946	0.292333	0.982566
No_IgG	0	6.775	6.946	0.292333	0.9743
Control_IgGs	40	7.308	6.946	0.292333	1.05441
Control_IgGs	40	7.407	6.946	0.292333	1.06929
Control_IgGs	40	7.691	6.946	0.292333	1.11197
Donor_25	40	6.753	6.946	0.292333	0.970993
Donor_25	40	6.271	6.946	0.292333	0.898552
Donor_25	40	5.443	6.946	0.292333	0.77411
Donor_25_PcrV_dep	40	8.6	6.946	0.292333	1.24858
Donor_25_PcrV_dep	40	8.584	6.946	0.292333	1.24618
Donor_25_PcrV_dep	40	8.772	6.946	0.292333	1.27444
Control_IgGs	80	7.429	6.946	0.292333	1.07259
Control_IgGs	80	6.795	6.946	0.292333	0.977306
Donor_25	80	3.3	6.946	0.292333	0.452031
Donor_25	80	2.543	6.946	0.292333	0.33826
Donor_25	80	3.635	6.946	0.292333	0.50238
Donor_25_PcrV_dep	80	5.412	6.946	0.292333	0.76945
Donor_25_PcrV_dep	80	4.911	6.946	0.292333	0.694154
Control_IgGs	160	6.513	6.946	0.292333	0.934923
Control_IgGs	160	7.464	6.946	0.292333	1.07785
Donor_25	160	1.052	6.946	0.292333	0.114173
Donor_25	160	1.222	6.946	0.292333	0.139722
Donor_25	160	1.179	6.946	0.292333	0.13326
Donor_25_PcrV_dep	160	1.874	6.946	0.292333	0.237714
Donor_25_PcrV_dep	160	2.118	6.946	0.292333	0.274385
Donor_25_PcrV_dep	160	4.234	6.946	0.292333	0.592405
Donor 25 - PscF depletion
IgGs	Concentration	Raw_injection	Mean_No_IgG	Mean_Non_infected	Norm_injection
No_IgG	0	6.72	6.96667	0.305	0.962972
No_IgG	0	6.948	6.96667	0.305	0.997198
No_IgG	0	7.232	6.96667	0.305	1.03983
Control_IgGs	40	6.609	6.96667	0.305	0.94631
Control_IgGs	40	6.953	6.96667	0.305	0.997948
Control_IgGs	40	6.887	6.96667	0.305	0.988041
Donor_25	40	7.29	6.96667	0.305	1.04854
Donor_25	40	7.423	6.96667	0.305	1.0685
Donor_25	40	7.562	6.96667	0.305	1.08937
Donor_25_PscF_dep	40	7.612	6.96667	0.305	1.09687
Donor_25_PscF_dep	40	7.776	6.96667	0.305	1.12149
Donor_25_PscF_dep	40	8.277	6.96667	0.305	1.1967
Control_IgGs	80	6.809	6.96667	0.305	0.976332
Control_IgGs	80	7.009	6.96667	0.305	1.00635
Control_IgGs	80	6.987	6.96667	0.305	1.00305
Donor_25	80	4.872	6.96667	0.305	0.685564
Donor_25	80	5.061	6.96667	0.305	0.713935
Donor_25	80	5.295	6.96667	0.305	0.749062
Donor_25_PscF_dep	80	5.778	6.96667	0.305	0.821566
Donor_25_PscF_dep	80	5.474	6.96667	0.305	0.775932
Donor_25_PscF_dep	80	5.927	6.96667	0.305	0.843933
Control_IgGs	160	6.803	6.96667	0.305	0.975432
Control_IgGs	160	6.986	6.96667	0.305	1.0029
Control_IgGs	160	7.302	6.96667	0.305	1.05034
Donor_25	160	2.539	6.96667	0.305	0.335352
Donor_25	160	2.94	6.96667	0.305	0.395547
Donor_25	160	2.967	6.96667	0.305	0.3996
Donor_25_PscF_dep	160	3.155	6.96667	0.305	0.427821
Donor_25_PscF_dep	160	3.339	6.96667	0.305	0.455442
Donor_25_PscF_dep	160	3.257	6.96667	0.305	0.443132
