# Supplementary material for: Neutralizing human monoclonal antibodies that target the PcrV component of the type III secretion system of Pseudomonas aeruginosa act through distinct mechanisms
Source: eLife. 2026 Feb 17;14:RP105195. doi: 10.7554/eLife.105195 (PMC12912723; doi:10.7554/eLife.105195)
Supplement: Figure 2—source data 1. [file elife-105195-fig2-data1.xlsx]

## Sheet: EC50
Concentration	S4P5B3	S4P3D6	S4P3D6	S4P5E10	S3P1B4	S3P1F5	S4P3G6	S4P3G7	S3P1D7	S4P5G10	S4P3G2	S4P5D5	S3P1D7
50	3.2755	2.7846	3.2758	3.2174	2.8525	1.8	2.9201	2.4103	1.376	1.9344	1.2278	3.0325	1.376
5	3.3146	2.891	3.2894	3.2714	2.5891	1.0834	2.6015	0.9541	0.6936	2.0052	0.8474	2.8538	0.6936
0.5	3.2093	2.6976	3.1856	3.1081	1.7223	0.4996	0.797	0.1989	0.5546	1.854	0.5706	2.4561	0.5546
0.05	2.4046	1.2197	2.6307	2.2178	0.4201	0.2132	0.1511	0.0974	0.4812	1.8411	0.1358	1.4323	0.4812
0.005	0.5922	0.2474	0.7236	0.5379	0.0992	0.1209	0.0949	0.0821	0.3052	0.498	0.083	0.2093	0.3052
0.0005	0.1394	0.1141	0.1663	0.1349	0.0758	0.0745	0.0785	0.0803	0.1144	0.1222	0.0699	0.078	0.1144
5e-05	0.0896	0.0826	0.0878	0.0996	0.1062	0.0903	0.0808	0.0782	0.0976	0.0779	0.0708	0.0751	0.0976
0	0.0814	0.0851	0.078	0.0874	0.3059	0.2173	0.1202	0.0861	0.2264	0.0737	0.0886	0.0683	0.2264
Concentration	S3P1D5	S3P1B7	S3P1F5	S4P3G6	S4P3G7	S4P3G2	S3P1D7	S3P1B4
100	2.4999	2.6136	1.5385	1.987	1.6448	1.103	0.7128	1.9997
20	2.5418	2.6451	0.9948	2.0003	0.9325	0.8354	0.5914	2.0148
4	2.1514	2.4381	0.6663	1.4844	0.4603	0.647	0.6413	1.8954
0.8	1.9796	2.4454	0.486	0.7532	0.1954	0.4344	0.5688	1.8434
0.16	1.3194	1.9511	0.3137	0.303	0.1414	0.1779	0.4845	1.2055
0.032	0.6461	0.9677	0.2094	0.1471	0.2856	0.1276	0.4419	0.5086
0.0064	0.2408	0.3217	0.1343	0.1086	0.1487	0.1168	0.3267	0.1969
0.00128	0.1375	0.1466	0.1111	0.0983	0.1354	0.1319	0.1936	0.1143
Concentration	S4P5B3	S4P5B3	S1P3G9	S4P5E10
100	2.4269	2.0762	2.24	2.4248
20	2.4797	2.5149	2.5139	2.7346
4	2.4026	2.2977	3.02	2.6476
0.8	2.4597	1.6178	3.1873	1.8491
0.16	2.2026	0.978	2.8508	0.8644
0.032	1.6531	0.7663	1.7949	0.7597
0.0064	0.9164	0.6323	0.6273	0.4284
0	0.0837	0.0917	0.1409	0.0713
Concentration	S4P5B3	S4P3D6	S1P3G9
50	3.5062	3.5043	3.4949
10	3.5218	3.5202	3.544
2	3.5142	3.5153	3.519
0.4	3.4938	3.5076	3.497
0.08	3.0045	3.3817	3.4571
0.016	1.4887	2.2343	2.4129
0.0032	0.7858	1.0715	1.1458
0	0.5099	0.7826	0.5456

## Sheet: Injection inhibition
Experiment	Ab	Concentration	Raw_injection	Mean_No_IgG	Mean_Non_infected	Norm_injection
14062024	P5B3	100	3.42	4.28333	1.01333	0.735984
14062024	P5B3	100	3.49	4.28333	1.01333	0.75739
14062024	P5B3	100	3.57	4.28333	1.01333	0.781855
14062024	P3D6	100	1.2	4.28333	1.01333	0.0570846
14062024	P3D6	100	1.25	4.28333	1.01333	0.0723751
14062024	P3D6	100	1.22	4.28333	1.01333	0.0632008
14062024	P5E10	100	4.34	4.28333	1.01333	1.01733
14062024	P5E10	100	4.38	4.28333	1.01333	1.02956
14062024	P5E10	100	4	4.28333	1.01333	0.913354
14062024	P3G9	100	4.25	4.28333	1.01333	0.989806
14062024	P3G9	100	4.35	4.28333	1.01333	1.02039
14062024	P3G9	100	5.46	4.28333	1.01333	1.35984
14062024	No_Ab	0	4.11	4.28333	1.01333	0.946993
14062024	No_Ab	0	4.32	4.28333	1.01333	1.01121
14062024	No_Ab	0	3.92	4.28333	1.01333	0.888889
14062024	No_Ab	0	4.28	4.28333	1.01333	0.998981
14062024	No_Ab	0	4.64	4.28333	1.01333	1.10907
14062024	No_Ab	0	4.43	4.28333	1.01333	1.04485
16022022	P5G10	100	7.05119	5.8789	0.488423	1.21747
16022022	P5G10	100	7.47658	5.8789	0.488423	1.29639
16022022	P5G10	100	7.20686	5.8789	0.488423	1.24635
4082022	P1B7	100	4.5771	5.09668	0.560208	0.885466
4082022	P1B7	100	4.43027	5.09668	0.560208	0.853098
4082022	P1B7	100	3.86383	5.09668	0.560208	0.728237
16022022	P5D5	100	7.07951	5.8789	0.488423	1.22273
16022022	P5D5	100	6.58198	5.8789	0.488423	1.13043
16022022	P5D5	100	6.76031	5.8789	0.488423	1.16351
4082022	P1D5	100	5.36273	5.09668	0.560208	1.05865
4082022	P1D5	100	5.7345	5.09668	0.560208	1.1406
4082022	P1D5	100	6.69081	5.09668	0.560208	1.3514
16022022	P1B4	100	5.89863	5.8789	0.488423	1.00366
16022022	P1B4	100	7.47909	5.8789	0.488423	1.29685
16022022	P1B4	100	7.02191	5.8789	0.488423	1.21204
16022022	P3G6	100	6.56172	5.8789	0.488423	1.12667
16022022	P3G6	100	7.85986	5.8789	0.488423	1.36749
16022022	P3G6	100	6.8316	5.8789	0.488423	1.17674
16022022	P3G7	100	6.55913	5.8789	0.488423	1.12619
16022022	P3G7	100	6.76882	5.8789	0.488423	1.16509
16022022	P3G7	100	7.2956	5.8789	0.488423	1.26281
16022022	P1F5	100	6.24906	5.8789	0.488423	1.06867
16022022	P1F5	100	6.42285	5.8789	0.488423	1.10091
16022022	P1F5	100	6.0933	5.8789	0.488423	1.03977
16022022	P3G2	100	7.17583	5.8789	0.488423	1.2406
16022022	P3G2	100	7.1617	5.8789	0.488423	1.23797
16022022	P3G2	100	6.90402	5.8789	0.488423	1.19017
16022022	P1D7	100	6.49882	5.8789	0.488423	1.115
16022022	P1D7	100	6.69626	5.8789	0.488423	1.15163
16022022	P1D7	100	7.26941	5.8789	0.488423	1.25796
4082022	No_Ab	0	5.1786	5.09668	0.560208	1.01806
4082022	No_Ab	0	5.0531	5.09668	0.560208	0.990392
4082022	No_Ab	0	4.99372	5.09668	0.560208	0.977304
4082022	No_Ab	0	5.19412	5.09668	0.560208	1.02148
4082022	No_Ab	0	5.71815	5.09668	0.560208	1.13699
4082022	No_Ab	0	4.4424	5.09668	0.560208	0.855773
16022022	No_Ab	0	4.17388	5.8789	0.488423	0.683697
16022022	No_Ab	0	5.84357	5.8789	0.488423	0.993445
16022022	No_Ab	0	6.24033	5.8789	0.488423	1.06705
16022022	No_Ab	0	6.55096	5.8789	0.488423	1.12467
16022022	No_Ab	0	6.65967	5.8789	0.488423	1.14484
16022022	No_Ab	0	6.35627	5.8789	0.488423	1.08856
16022022	No_Ab	0	6.19439	5.8789	0.488423	1.05853
16022022	No_Ab	0	6.58419	5.8789	0.488423	1.13084
16022022	No_Ab	0	6.22308	5.8789	0.488423	1.06385
16022022	No_Ab	0	5.37773	5.8789	0.488423	0.907026
16022022	No_Ab	0	5.33855	5.8789	0.488423	0.899757
16022022	No_Ab	0	5.00424	5.8789	0.488423	0.837739
