# Supplementary material for: Neutralizing human monoclonal antibodies that target the PcrV component of the type III secretion system of Pseudomonas aeruginosa act through distinct mechanisms
Source: eLife. 2026 Feb 17;14:RP105195. doi: 10.7554/eLife.105195 (PMC12912723; doi:10.7554/eLife.105195)
Supplement: Figure 3—source data 1. [file elife-105195-fig3-data1.xlsx]

## Sheet: Fig_3
Experiment	Variant	Ab	Raw_injection	Mean_No_IgG	Mean_Non_infected	Norm_injection
15122023	V1	Donor_IgGs	1.19	15.7217	1.00167	0.0127944
15122023	V1	Donor_IgGs	1.18	15.7217	1.00167	0.012115
15122023	V1	Donor_IgGs	1.26	15.7217	1.00167	0.0175498
20122023	V1	Donor_IgGs	2.59	16.1733	1.00167	0.104691
20122023	V1	Donor_IgGs	1.89	16.1733	1.00167	0.0585521
20122023	V1	Donor_IgGs	2.17	16.1733	1.00167	0.0770076
15122023	V1	No_Ab	12.89	15.7217	1.00167	0.807631
15122023	V1	No_Ab	16.28	15.7217	1.00167	1.03793
15122023	V1	No_Ab	16.27	15.7217	1.00167	1.03725
15122023	V1	No_Ab	14.57	15.7217	1.00167	0.921762
15122023	V1	No_Ab	16.08	15.7217	1.00167	1.02434
15122023	V1	No_Ab	18.24	15.7217	1.00167	1.17108
20122023	V1	No_Ab	16.36	16.1733	1.00167	1.0123
20122023	V1	No_Ab	16.88	16.1733	1.00167	1.04658
20122023	V1	No_Ab	16.56	16.1733	1.00167	1.02549
20122023	V1	No_Ab	14.75	16.1733	1.00167	0.906185
20122023	V1	No_Ab	15.67	16.1733	1.00167	0.966824
20122023	V1	No_Ab	16.82	16.1733	1.00167	1.04262
15122023	V1	P3D6	2.62	15.7217	1.00167	0.109941
15122023	V1	P3D6	2.42	15.7217	1.00167	0.0963542
15122023	V1	P3D6	2.63	15.7217	1.00167	0.11062
20122023	V1	P3D6	2.37	16.1733	1.00167	0.09019
20122023	V1	P3D6	2.19	16.1733	1.00167	0.0783258
20122023	V1	P3D6	2.66	16.1733	1.00167	0.109305
15122023	V1	P5B3	10.28	15.7217	1.00167	0.630322
15122023	V1	P5B3	6.98	15.7217	1.00167	0.406137
15122023	V1	P5B3	8.6	15.7217	1.00167	0.516191
20122023	V1	P5B3	8.28	16.1733	1.00167	0.479732
20122023	V1	P5B3	8.58	16.1733	1.00167	0.499506
20122023	V1	P5B3	9.06	16.1733	1.00167	0.531144
15122023	V1	VRCO1	14.74	15.7217	1.00167	0.933311
15122023	V1	VRCO1	16.83	15.7217	1.00167	1.07529
15122023	V1	VRCO1	19.19	15.7217	1.00167	1.23562
20122023	V1	VRCO1	15.85	16.1733	1.00167	0.978688
20122023	V1	VRCO1	18.17	16.1733	1.00167	1.1316
20122023	V1	VRCO1	17.44	16.1733	1.00167	1.08349
220719	V2	Donor_IgGs	1.091	4.19233	0.445444	0.172291
220719	V2	Donor_IgGs	1.212	4.19233	0.445444	0.204585
220719	V2	Donor_IgGs	1.091	4.19233	0.445444	0.172291
220722	V2	Donor_IgGs	1.908	4.98	0.312	0.341902
220722	V2	Donor_IgGs	2.102	4.98	0.312	0.383462
220722	V2	Donor_IgGs	2.789	4.98	0.312	0.530634
220823	V2	Donor_IgGs	0.632	4.109	0.240444	0.101215
220823	V2	Donor_IgGs	0.781	4.109	0.240444	0.139731
220823	V2	Donor_IgGs	0.692	4.109	0.240444	0.116725
230526	V2	Donor_IgGs	1.232	6.519	0.438667	0.130475
230526	V2	Donor_IgGs	1.022	6.519	0.438667	0.0959377
230526	V2	Donor_IgGs	1.244	6.519	0.438667	0.132449
230602	V2	Donor_IgGs	1.1	4.02	0.342556	0.20597
230602	V2	Donor_IgGs	1.688	4.02	0.342556	0.365864
230602	V2	Donor_IgGs	1.005	4.02	0.342556	0.180137
230609	V2	Donor_IgGs	1.698	3.32367	0.339111	0.455307
230609	V2	Donor_IgGs	1.901	3.32367	0.339111	0.523324
230609	V2	Donor_IgGs	1.773	3.32367	0.339111	0.480436
220719	V2	No_Ab	4.837	4.19233	0.445444	1.17205
220719	V2	No_Ab	4.072	4.19233	0.445444	0.967884
220719	V2	No_Ab	3.668	4.19233	0.445444	0.860062
220722	V2	No_Ab	5.466	4.98	0.312	1.10411
220722	V2	No_Ab	4.826	4.98	0.312	0.967009
220722	V2	No_Ab	4.648	4.98	0.312	0.928877
220823	V2	No_Ab	4.384	4.109	0.240444	1.07109
220823	V2	No_Ab	4.13	4.109	0.240444	1.00543
220823	V2	No_Ab	3.813	4.109	0.240444	0.923486
230526	V2	No_Ab	6.734	6.519	0.438667	1.03536
230526	V2	No_Ab	6.681	6.519	0.438667	1.02664
230526	V2	No_Ab	6.142	6.519	0.438667	0.937997
230602	V2	No_Ab	4.198	4.02	0.342556	1.0484
230602	V2	No_Ab	4.278	4.02	0.342556	1.07016
230602	V2	No_Ab	3.584	4.02	0.342556	0.881439
230609	V2	No_Ab	3.896	3.32367	0.339111	1.19177
230609	V2	No_Ab	3.142	3.32367	0.339111	0.939131
230609	V2	No_Ab	2.933	3.32367	0.339111	0.869104
220719	V2	P3D6	5.627	4.19233	0.445444	1.3829
220719	V2	P3D6	5.459	4.19233	0.445444	1.33806
220719	V2	P3D6	5.407	4.19233	0.445444	1.32418
220722	V2	P3D6	4.948	4.98	0.312	0.993145
220722	V2	P3D6	5.731	4.98	0.312	1.16088
220722	V2	P3D6	5.957	4.98	0.312	1.2093
220823	V2	P3D6	4.841	4.109	0.240444	1.18922
220823	V2	P3D6	4.302	4.109	0.240444	1.04989
220823	V2	P3D6	4.422	4.109	0.240444	1.08091
230526	V2	P3D6	4.741	6.519	0.438667	0.707582
230526	V2	P3D6	6.153	6.519	0.438667	0.939806
230526	V2	P3D6	5.939	6.519	0.438667	0.90461
230602	V2	P3D6	3.652	4.02	0.342556	0.899931
230602	V2	P3D6	4.033	4.02	0.342556	1.00354
230602	V2	P3D6	3.989	4.02	0.342556	0.99157
230609	V2	P3D6	2.972	3.32367	0.339111	0.882171
230609	V2	P3D6	2.928	3.32367	0.339111	0.867429
230609	V2	P3D6	2.711	3.32367	0.339111	0.794721
220719	V2	P5B3	3.392	4.19233	0.445444	0.786401
220719	V2	P5B3	3.841	4.19233	0.445444	0.906233
220719	V2	P5B3	3.318	4.19233	0.445444	0.766651
220722	V2	P5B3	3.313	4.98	0.312	0.642888
220722	V2	P5B3	3.957	4.98	0.312	0.780848
220722	V2	P5B3	3.97	4.98	0.312	0.783633
220823	V2	P5B3	3.031	4.109	0.240444	0.721343
220823	V2	P5B3	2.843	4.109	0.240444	0.672746
220823	V2	P5B3	2.519	4.109	0.240444	0.588994
230526	V2	P5B3	2.974	6.519	0.438667	0.416973
230526	V2	P5B3	3.109	6.519	0.438667	0.439175
230526	V2	P5B3	3.218	6.519	0.438667	0.457102
230602	V2	P5B3	2.604	4.02	0.342556	0.61495
230602	V2	P5B3	2.563	4.02	0.342556	0.603801
230602	V2	P5B3	2.72	4.02	0.342556	0.646494
230609	V2	P5B3	2.052	3.32367	0.339111	0.573918
230609	V2	P5B3	2.088	3.32367	0.339111	0.58598
230609	V2	P5B3	1.895	3.32367	0.339111	0.521313
220719	V2	VRCO1	5.745	4.19233	0.445444	1.41439
220719	V2	VRCO1	5.989	4.19233	0.445444	1.47951
220719	V2	VRCO1	5.608	4.19233	0.445444	1.37782
220722	V2	VRCO1	5.242	4.98	0.312	1.05613
220722	V2	VRCO1	5.591	4.98	0.312	1.13089
220722	V2	VRCO1	6.42	4.98	0.312	1.30848
220823	V2	VRCO1	5.091	4.109	0.240444	1.25384
220823	V2	VRCO1	5.499	4.109	0.240444	1.35931
220823	V2	VRCO1	5.65	4.109	0.240444	1.39834
230526	V2	VRCO1	6.038	6.519	0.438667	0.920892
230526	V2	VRCO1	5.506	6.519	0.438667	0.833397
230526	V2	VRCO1	5.835	6.519	0.438667	0.887506
230602	V2	VRCO1	3.298	4.02	0.342556	0.803668
230602	V2	VRCO1	3.642	4.02	0.342556	0.897211
230602	V2	VRCO1	4.07	4.02	0.342556	1.0136
230609	V2	VRCO1	3.741	3.32367	0.339111	1.13983
230609	V2	VRCO1	3.657	3.32367	0.339111	1.11169
230609	V2	VRCO1	2.642	3.32367	0.339111	0.771602
220719	V3	Donor_IgGs	1.288	4.376	0.445444	0.21436
220719	V3	Donor_IgGs	1.055	4.376	0.445444	0.155081
220719	V3	Donor_IgGs	1.165	4.376	0.445444	0.183067
220823	V3	Donor_IgGs	0.859	3.55833	0.240444	0.18643
220823	V3	Donor_IgGs	0.772	3.55833	0.240444	0.160209
220823	V3	Donor_IgGs	0.743	3.55833	0.240444	0.151468
230526	V3	Donor_IgGs	0.743	5.445	0.438667	0.0607897
230526	V3	Donor_IgGs	0.813	5.445	0.438667	0.074772
230526	V3	Donor_IgGs	0.702	5.445	0.438667	0.0526
220719	V3	No_Ab	4.331	4.376	0.445444	0.988551
220719	V3	No_Ab	4.567	4.376	0.445444	1.04859
220719	V3	No_Ab	4.23	4.376	0.445444	0.962855
220823	V3	No_Ab	3.813	3.55833	0.240444	1.07676
220823	V3	No_Ab	3.521	3.55833	0.240444	0.988748
220823	V3	No_Ab	3.341	3.55833	0.240444	0.934497
230526	V3	No_Ab	5.668	5.445	0.438667	1.04454
230526	V3	No_Ab	5.839	5.445	0.438667	1.0787
230526	V3	No_Ab	4.828	5.445	0.438667	0.876756
220719	V3	P3D6	5.943	4.376	0.445444	1.39867
220719	V3	P3D6	5.659	4.376	0.445444	1.32642
220719	V3	P3D6	5.567	4.376	0.445444	1.30301
220823	V3	P3D6	4.495	3.55833	0.240444	1.28231
220823	V3	P3D6	4.2	3.55833	0.240444	1.1934
220823	V3	P3D6	4.261	3.55833	0.240444	1.21178
230526	V3	P3D6	5.59	5.445	0.438667	1.02896
230526	V3	P3D6	5.231	5.445	0.438667	0.957254
230526	V3	P3D6	5.21	5.445	0.438667	0.953059
220719	V3	P5B3	3.065	4.376	0.445444	0.666459
220719	V3	P5B3	2.665	4.376	0.445444	0.564693
220719	V3	P5B3	2.599	4.376	0.445444	0.547901
220823	V3	P5B3	2.61	3.55833	0.240444	0.714176
220823	V3	P5B3	2.182	3.55833	0.240444	0.585178
220823	V3	P5B3	2.332	3.55833	0.240444	0.630387
230526	V3	P5B3	2.2	5.445	0.438667	0.351821
230526	V3	P5B3	2.835	5.445	0.438667	0.47866
230526	V3	P5B3	2.905	5.445	0.438667	0.492643
220719	V3	VRCO1	4.598	4.376	0.445444	1.05648
220719	V3	VRCO1	4.451	4.376	0.445444	1.01908
220719	V3	VRCO1	4.384	4.376	0.445444	1.00204
220823	V3	VRCO1	4.523	3.55833	0.240444	1.29075
220823	V3	VRCO1	4.317	3.55833	0.240444	1.22866
220823	V3	VRCO1	4.747	3.55833	0.240444	1.35826
230526	V3	VRCO1	4.885	5.445	0.438667	0.888142
230526	V3	VRCO1	4.656	5.445	0.438667	0.8424
230526	V3	VRCO1	4.78	5.445	0.438667	0.867168
220722	V4	Donor_IgGs	2.866	5.504	0.312	0.491911
220722	V4	Donor_IgGs	3.246	5.504	0.312	0.5651
220722	V4	Donor_IgGs	3.119	5.504	0.312	0.540639
230602	V4	Donor_IgGs	1.225	3.5815	0.342556	0.272448
230602	V4	Donor_IgGs	1.67	3.5815	0.342556	0.409839
230602	V4	Donor_IgGs	1.317	3.5815	0.342556	0.300852
230609	V4	Donor_IgGs	1.866	2.67233	0.339111	0.654412
230609	V4	Donor_IgGs	1.619	2.67233	0.339111	0.54855
230609	V4	Donor_IgGs	2.137	2.67233	0.339111	0.770561
220722	V4	No_Ab	5.607	5.504	0.312	1.01984
220722	V4	No_Ab	5.609	5.504	0.312	1.02022
220722	V4	No_Ab	5.296	5.504	0.312	0.959938
230602	V4	No_Ab	3.599	3.5815	0.342556	1.0054
230602	V4	No_Ab	3.564	3.5815	0.342556	0.994597
230609	V4	No_Ab	2.671	2.67233	0.339111	0.999429
230609	V4	No_Ab	3.015	2.67233	0.339111	1.14686
230609	V4	No_Ab	2.331	2.67233	0.339111	0.853707
220722	V4	P3D6	5.679	5.504	0.312	1.03371
220722	V4	P3D6	5.961	5.504	0.312	1.08802
220722	V4	P3D6	6.303	5.504	0.312	1.15389
230602	V4	P3D6	4.457	3.5815	0.342556	1.2703
230602	V4	P3D6	4.143	3.5815	0.342556	1.17336
230602	V4	P3D6	3.889	3.5815	0.342556	1.09494
230609	V4	P3D6	2.357	2.67233	0.339111	0.864851
230609	V4	P3D6	2.016	2.67233	0.339111	0.718701
230609	V4	P3D6	2.406	2.67233	0.339111	0.885852
220722	V4	P5B3	3.647	5.504	0.312	0.642334
220722	V4	P5B3	3.997	5.504	0.312	0.709746
220722	V4	P5B3	3.957	5.504	0.312	0.702042
230602	V4	P5B3	2.835	3.5815	0.342556	0.769524
230602	V4	P5B3	2.27	3.5815	0.342556	0.595084
230602	V4	P5B3	2.418	3.5815	0.342556	0.640778
230609	V4	P5B3	1.267	2.67233	0.339111	0.397686
230609	V4	P5B3	1.332	2.67233	0.339111	0.425544
230609	V4	P5B3	1.739	2.67233	0.339111	0.599981
220722	V4	VRCO1	5.944	5.504	0.312	1.08475
220722	V4	VRCO1	5.091	5.504	0.312	0.920455
220722	V4	VRCO1	5.474	5.504	0.312	0.994222
230602	V4	VRCO1	4.243	3.5815	0.342556	1.20423
230602	V4	VRCO1	4.645	3.5815	0.342556	1.32835
230602	V4	VRCO1	4.408	3.5815	0.342556	1.25518
230609	V4	VRCO1	2.796	2.67233	0.339111	1.053
230609	V4	VRCO1	2.727	2.67233	0.339111	1.02343
230609	V4	VRCO1	2.632	2.67233	0.339111	0.982713
220722	V5	Donor_IgGs	3.098	5.94067	0.312	0.494966
220722	V5	Donor_IgGs	3.085	5.94067	0.312	0.492657
220722	V5	Donor_IgGs	3.337	5.94067	0.312	0.537427
230602	V5	Donor_IgGs	1.246	3.90667	0.342556	0.253484
230602	V5	Donor_IgGs	0.94	3.90667	0.342556	0.167628
230602	V5	Donor_IgGs	1.013	3.90667	0.342556	0.18811
230609	V5	Donor_IgGs	2.438	2.488	0.339111	0.976732
230609	V5	Donor_IgGs	2.178	2.488	0.339111	0.855739
230609	V5	Donor_IgGs	2.164	2.488	0.339111	0.849224
220722	V5	No_Ab	6.229	5.94067	0.312	1.05123
220722	V5	No_Ab	6.021	5.94067	0.312	1.01427
220722	V5	No_Ab	5.572	5.94067	0.312	0.934502
230602	V5	No_Ab	3.97	3.90667	0.342556	1.01777
230602	V5	No_Ab	4.028	3.90667	0.342556	1.03404
230602	V5	No_Ab	3.722	3.90667	0.342556	0.948187
230609	V5	No_Ab	2.637	2.488	0.339111	1.06934
230609	V5	No_Ab	2.051	2.488	0.339111	0.796639
230609	V5	No_Ab	2.776	2.488	0.339111	1.13402
220722	V5	P3D6	6.744	5.94067	0.312	1.14272
220722	V5	P3D6	6.757	5.94067	0.312	1.14503
220722	V5	P3D6	6.942	5.94067	0.312	1.1779
230602	V5	P3D6	4.16	3.90667	0.342556	1.07108
230602	V5	P3D6	4.353	3.90667	0.342556	1.12523
230602	V5	P3D6	4.094	3.90667	0.342556	1.05256
230609	V5	P3D6	3.234	2.488	0.339111	1.34716
230609	V5	P3D6	3.165	2.488	0.339111	1.31505
230609	V5	P3D6	3.041	2.488	0.339111	1.25734
220722	V5	P5B3	4.485	5.94067	0.312	0.741383
220722	V5	P5B3	4.199	5.94067	0.312	0.690572
220722	V5	P5B3	4.605	5.94067	0.312	0.762703
230602	V5	P5B3	2.227	3.90667	0.342556	0.528728
230602	V5	P5B3	2.399	3.90667	0.342556	0.576987
230602	V5	P5B3	2.415	3.90667	0.342556	0.581476
230609	V5	P5B3	1.565	2.488	0.339111	0.570476
230609	V5	P5B3	1.594	2.488	0.339111	0.583971
230609	V5	P5B3	1.774	2.488	0.339111	0.667735
220722	V5	VRCO1	5.51	5.94067	0.312	0.923487
220722	V5	VRCO1	5.967	5.94067	0.312	1.00468
220722	V5	VRCO1	5.564	5.94067	0.312	0.933081
230602	V5	VRCO1	3.887	3.90667	0.342556	0.994482
230602	V5	VRCO1	3.863	3.90667	0.342556	0.987748
230602	V5	VRCO1	3.157	3.90667	0.342556	0.789662
230609	V5	VRCO1	2.511	2.488	0.339111	1.0107
230609	V5	VRCO1	2.588	2.488	0.339111	1.04654
230609	V5	VRCO1	2.513	2.488	0.339111	1.01163

## Sheet: Fig_supp
Experiment	Variant	Ab	Concentration	Raw_injection	Mean_No_IgG	Mean_Non_infected	Norm_injection
20122023	V1	No_Ab	0	16.36	16.1733	1.00167	1.0123
20122023	V1	No_Ab	0	16.88	16.1733	1.00167	1.04658
20122023	V1	No_Ab	0	16.56	16.1733	1.00167	1.02549
20122023	V1	No_Ab	0	14.75	16.1733	1.00167	0.906185
20122023	V1	No_Ab	0	15.67	16.1733	1.00167	0.966824
20122023	V1	No_Ab	0	16.82	16.1733	1.00167	1.04262
15122023	V1	No_Ab	0	12.89	15.7217	1.00167	0.807631
15122023	V1	No_Ab	0	16.28	15.7217	1.00167	1.03793
15122023	V1	No_Ab	0	16.27	15.7217	1.00167	1.03725
15122023	V1	No_Ab	0	14.57	15.7217	1.00167	0.921762
15122023	V1	No_Ab	0	16.08	15.7217	1.00167	1.02434
15122023	V1	No_Ab	0	18.24	15.7217	1.00167	1.17108
20122023	V1	P5B3	0.01	14	16.1733	1.00167	0.856751
20122023	V1	P5B3	0.01	17.17	16.1733	1.00167	1.06569
20122023	V1	P5B3	0.01	16.15	16.1733	1.00167	0.998462
15122023	V1	P5B3	0.01	17.67	15.7217	1.00167	1.13236
15122023	V1	P5B3	0.01	15.87	15.7217	1.00167	1.01008
15122023	V1	P5B3	0.01	17.07	15.7217	1.00167	1.0916
20122023	V1	P5B3	0.1	13.05	16.1733	1.00167	0.794134
20122023	V1	P5B3	0.1	14.46	16.1733	1.00167	0.88707
20122023	V1	P5B3	0.1	14.88	16.1733	1.00167	0.914753
15122023	V1	P5B3	0.1	15.28	15.7217	1.00167	0.969995
15122023	V1	P5B3	0.1	12.89	15.7217	1.00167	0.807631
15122023	V1	P5B3	0.1	13.45	15.7217	1.00167	0.845675
20122023	V1	P5B3	1	11.24	16.1733	1.00167	0.674832
20122023	V1	P5B3	1	12.23	16.1733	1.00167	0.740086
20122023	V1	P5B3	1	11.86	16.1733	1.00167	0.715698
15122023	V1	P5B3	1	14.33	15.7217	1.00167	0.905457
15122023	V1	P5B3	1	10.77	15.7217	1.00167	0.66361
15122023	V1	P5B3	1	11.52	15.7217	1.00167	0.714561
20122023	V1	P5B3	10	10.43	16.1733	1.00167	0.621443
20122023	V1	P5B3	10	11.73	16.1733	1.00167	0.70713
20122023	V1	P5B3	10	11.62	16.1733	1.00167	0.699879
15122023	V1	P5B3	10	12.13	15.7217	1.00167	0.756001
15122023	V1	P5B3	10	10.63	15.7217	1.00167	0.654099
15122023	V1	P5B3	10	11.9	15.7217	1.00167	0.740376
20122023	V1	P5B3	100	8.28	16.1733	1.00167	0.479732
20122023	V1	P5B3	100	8.58	16.1733	1.00167	0.499506
20122023	V1	P5B3	100	9.06	16.1733	1.00167	0.531144
15122023	V1	P5B3	100	10.28	15.7217	1.00167	0.630322
15122023	V1	P5B3	100	6.98	15.7217	1.00167	0.406137
15122023	V1	P5B3	100	8.6	15.7217	1.00167	0.516191
20122023	V1	No_Ab	0	16.36	16.1733	1.00167	1.0123
20122023	V1	No_Ab	0	16.88	16.1733	1.00167	1.04658
20122023	V1	No_Ab	0	16.56	16.1733	1.00167	1.02549
20122023	V1	No_Ab	0	14.75	16.1733	1.00167	0.906185
20122023	V1	No_Ab	0	15.67	16.1733	1.00167	0.966824
20122023	V1	No_Ab	0	16.82	16.1733	1.00167	1.04262
15122023	V1	No_Ab	0	12.89	15.7217	1.00167	0.807631
15122023	V1	No_Ab	0	16.28	15.7217	1.00167	1.03793
15122023	V1	No_Ab	0	16.27	15.7217	1.00167	1.03725
15122023	V1	No_Ab	0	14.57	15.7217	1.00167	0.921762
15122023	V1	No_Ab	0	16.08	15.7217	1.00167	1.02434
15122023	V1	No_Ab	0	18.24	15.7217	1.00167	1.17108
20122023	V1	P3D6	0.01	15.77	16.1733	1.00167	0.973415
20122023	V1	P3D6	0.01	17.68	16.1733	1.00167	1.09931
20122023	V1	P3D6	0.01	16.03	16.1733	1.00167	0.990553
15122023	V1	P3D6	0.01	17.58	15.7217	1.00167	1.12625
15122023	V1	P3D6	0.01	16.32	15.7217	1.00167	1.04065
15122023	V1	P3D6	0.01	17.43	15.7217	1.00167	1.11606
20122023	V1	P3D6	0.1	17.04	16.1733	1.00167	1.05712
20122023	V1	P3D6	0.1	17.16	16.1733	1.00167	1.06503
20122023	V1	P3D6	0.1	16.51	16.1733	1.00167	1.02219
15122023	V1	P3D6	0.1	16.85	15.7217	1.00167	1.07665
15122023	V1	P3D6	0.1	15.77	15.7217	1.00167	1.00328
15122023	V1	P3D6	0.1	16.12	15.7217	1.00167	1.02706
20122023	V1	P3D6	1	12.51	16.1733	1.00167	0.758541
20122023	V1	P3D6	1	12.29	16.1733	1.00167	0.74404
20122023	V1	P3D6	1	13.7	16.1733	1.00167	0.836977
15122023	V1	P3D6	1	11.68	15.7217	1.00167	0.72543
15122023	V1	P3D6	1	12.45	15.7217	1.00167	0.77774
15122023	V1	P3D6	1	11.86	15.7217	1.00167	0.737659
20122023	V1	P3D6	10	6.91	16.1733	1.00167	0.389432
20122023	V1	P3D6	10	6.33	16.1733	1.00167	0.351203
20122023	V1	P3D6	10	5.8	16.1733	1.00167	0.316269
15122023	V1	P3D6	10	5.03	15.7217	1.00167	0.273664
15122023	V1	P3D6	10	4.93	15.7217	1.00167	0.26687
15122023	V1	P3D6	10	3.81	15.7217	1.00167	0.190784
20122023	V1	P3D6	100	2.37	16.1733	1.00167	0.09019
20122023	V1	P3D6	100	2.19	16.1733	1.00167	0.0783258
20122023	V1	P3D6	100	2.66	16.1733	1.00167	0.109305
15122023	V1	P3D6	100	2.62	15.7217	1.00167	0.109941
15122023	V1	P3D6	100	2.42	15.7217	1.00167	0.0963542
15122023	V1	P3D6	100	2.63	15.7217	1.00167	0.11062
220719	V2	No_Ab	0	4.837	4.19233	0.445444	1.17205
220719	V2	No_Ab	0	4.072	4.19233	0.445444	0.967884
220719	V2	No_Ab	0	3.668	4.19233	0.445444	0.860062
220722	V2	No_Ab	0	5.466	4.98	0.312	1.10411
220722	V2	No_Ab	0	4.826	4.98	0.312	0.967009
220722	V2	No_Ab	0	4.648	4.98	0.312	0.928877
220823	V2	No_Ab	0	4.384	4.109	0.240444	1.07109
220823	V2	No_Ab	0	4.13	4.109	0.240444	1.00543
220823	V2	No_Ab	0	3.813	4.109	0.240444	0.923486
230526	V2	No_Ab	0	6.734	6.519	0.438667	1.03536
230526	V2	No_Ab	0	6.681	6.519	0.438667	1.02664
230526	V2	No_Ab	0	6.142	6.519	0.438667	0.937997
230602	V2	No_Ab	0	4.198	4.02	0.342556	1.0484
230602	V2	No_Ab	0	4.278	4.02	0.342556	1.07016
230602	V2	No_Ab	0	3.584	4.02	0.342556	0.881439
230609	V2	No_Ab	0	3.896	3.32367	0.339111	1.19177
230609	V2	No_Ab	0	3.142	3.32367	0.339111	0.939131
230609	V2	No_Ab	0	2.933	3.32367	0.339111	0.869104
220719	V2	P5B3	1	5.332	4.19233	0.445444	1.30416
220719	V2	P5B3	1	5.021	4.19233	0.445444	1.22116
220719	V2	P5B3	1	5.364	4.19233	0.445444	1.3127
220722	V2	P5B3	1	4.834	4.98	0.312	0.968723
220722	V2	P5B3	1	5.484	4.98	0.312	1.10797
220722	V2	P5B3	1	5.49	4.98	0.312	1.10925
220823	V2	P5B3	1	4.368	4.109	0.240444	1.06695
220823	V2	P5B3	1	4.164	4.109	0.240444	1.01422
220823	V2	P5B3	1	4.074	4.109	0.240444	0.990953
230526	V2	P5B3	1	5.212	6.519	0.438667	0.785045
230526	V2	P5B3	1	5.127	6.519	0.438667	0.771065
230526	V2	P5B3	1	5.09	6.519	0.438667	0.76498
230602	V2	P5B3	1	3.262	4.02	0.342556	0.793879
230602	V2	P5B3	1	4.165	4.02	0.342556	1.03943
230602	V2	P5B3	1	3.849	4.02	0.342556	0.9535
230609	V2	P5B3	1	3.12	3.32367	0.339111	0.93176
230609	V2	P5B3	1	2.738	3.32367	0.339111	0.803768
230609	V2	P5B3	1	3.091	3.32367	0.339111	0.922043
220719	V2	P5B3	10	4.917	4.19233	0.445444	1.1934
220719	V2	P5B3	10	5.034	4.19233	0.445444	1.22463
220719	V2	P5B3	10	4.824	4.19233	0.445444	1.16858
220722	V2	P5B3	10	4.283	4.98	0.312	0.850686
220722	V2	P5B3	10	5.053	4.98	0.312	1.01564
220722	V2	P5B3	10	5.114	4.98	0.312	1.02871
220823	V2	P5B3	10	3.889	4.109	0.240444	0.943131
220823	V2	P5B3	10	4.106	4.109	0.240444	0.999225
220823	V2	P5B3	10	3.969	4.109	0.240444	0.963811
230526	V2	P5B3	10	5.022	6.519	0.438667	0.753796
230526	V2	P5B3	10	3.802	6.519	0.438667	0.553149
230526	V2	P5B3	10	5.035	6.519	0.438667	0.755934
230602	V2	P5B3	10	3.225	4.02	0.342556	0.783817
230602	V2	P5B3	10	3.519	4.02	0.342556	0.863764
230602	V2	P5B3	10	4.204	4.02	0.342556	1.05003
230609	V2	P5B3	10	2.712	3.32367	0.339111	0.795056
230609	V2	P5B3	10	2.56	3.32367	0.339111	0.744127
230609	V2	P5B3	10	2.634	3.32367	0.339111	0.768921
220719	V2	P5B3	100	3.392	4.19233	0.445444	0.786401
220719	V2	P5B3	100	3.841	4.19233	0.445444	0.906233
220719	V2	P5B3	100	3.318	4.19233	0.445444	0.766651
220722	V2	P5B3	100	3.313	4.98	0.312	0.642888
220722	V2	P5B3	100	3.957	4.98	0.312	0.780848
220722	V2	P5B3	100	3.97	4.98	0.312	0.783633
220823	V2	P5B3	100	3.031	4.109	0.240444	0.721343
220823	V2	P5B3	100	2.843	4.109	0.240444	0.672746
220823	V2	P5B3	100	2.519	4.109	0.240444	0.588994
230526	V2	P5B3	100	2.974	6.519	0.438667	0.416973
230526	V2	P5B3	100	3.109	6.519	0.438667	0.439175
230526	V2	P5B3	100	3.218	6.519	0.438667	0.457102
230602	V2	P5B3	100	2.604	4.02	0.342556	0.61495
230602	V2	P5B3	100	2.563	4.02	0.342556	0.603801
230602	V2	P5B3	100	2.72	4.02	0.342556	0.646494
230609	V2	P5B3	100	2.052	3.32367	0.339111	0.573918
230609	V2	P5B3	100	2.088	3.32367	0.339111	0.58598
230609	V2	P5B3	100	1.895	3.32367	0.339111	0.521313
220719	V3	No_Ab	0	4.331	4.376	0.445444	0.988551
220719	V3	No_Ab	0	4.567	4.376	0.445444	1.04859
220719	V3	No_Ab	0	4.23	4.376	0.445444	0.962855
220823	V3	No_Ab	0	3.813	3.55833	0.240444	1.07676
220823	V3	No_Ab	0	3.521	3.55833	0.240444	0.988748
220823	V3	No_Ab	0	3.341	3.55833	0.240444	0.934496
230526	V3	No_Ab	0	5.668	5.445	0.438667	1.04454
230526	V3	No_Ab	0	5.839	5.445	0.438667	1.0787
230526	V3	No_Ab	0	4.828	5.445	0.438667	0.876756
220719	V3	P5B3	1	4.831	4.376	0.445444	1.11576
220719	V3	P5B3	1	4.167	4.376	0.445444	0.946827
220719	V3	P5B3	1	4.189	4.376	0.445444	0.952424
220823	V3	P5B3	1	3.404	3.55833	0.240444	0.953484
220823	V3	P5B3	1	3.521	3.55833	0.240444	0.988748
220823	V3	P5B3	1	3.421	3.55833	0.240444	0.958608
230526	V3	P5B3	1	3.478	5.445	0.438667	0.607098
230526	V3	P5B3	1	3.655	5.445	0.438667	0.642453
230526	V3	P5B3	1	3.79	5.445	0.438667	0.669419
220719	V3	P5B3	10	3.675	4.376	0.445444	0.821654
220719	V3	P5B3	10	3.921	4.376	0.445444	0.88424
220719	V3	P5B3	10	3.54	4.376	0.445444	0.787307
220823	V3	P5B3	10	3.104	3.55833	0.240444	0.863066
220823	V3	P5B3	10	3.279	3.55833	0.240444	0.91581
220823	V3	P5B3	10	2.803	3.55833	0.240444	0.772345
230526	V3	P5B3	10	3.582	5.445	0.438667	0.627871
230526	V3	P5B3	10	2.623	5.445	0.438667	0.436314
230526	V3	P5B3	10	3.474	5.445	0.438667	0.606299
220719	V3	P5B3	100	3.065	4.376	0.445444	0.666459
220719	V3	P5B3	100	2.665	4.376	0.445444	0.564693
220719	V3	P5B3	100	2.599	4.376	0.445444	0.547901
220823	V3	P5B3	100	2.61	3.55833	0.240444	0.714176
220823	V3	P5B3	100	2.182	3.55833	0.240444	0.585178
220823	V3	P5B3	100	2.332	3.55833	0.240444	0.630387
230526	V3	P5B3	100	2.2	5.445	0.438667	0.351821
230526	V3	P5B3	100	2.835	5.445	0.438667	0.47866
230526	V3	P5B3	100	2.905	5.445	0.438667	0.492643
220722	V4	No_Ab	0	5.607	5.504	0.312	1.01984
220722	V4	No_Ab	0	5.609	5.504	0.312	1.02022
220722	V4	No_Ab	0	5.296	5.504	0.312	0.959938
230602	V4	No_Ab	0	3.599	3.5815	0.342556	1.0054
230602	V4	No_Ab	0	3.564	3.5815	0.342556	0.994597
230609	V4	No_Ab	0	2.671	2.67233	0.339111	0.999429
230609	V4	No_Ab	0	3.015	2.67233	0.339111	1.14686
230609	V4	No_Ab	0	2.331	2.67233	0.339111	0.853707
220722	V4	P5B3	1	5.667	5.504	0.312	1.03139
220722	V4	P5B3	1	5.797	5.504	0.312	1.05643
220722	V4	P5B3	1	6.013	5.504	0.312	1.09804
230602	V4	P5B3	1	3.875	3.5815	0.342556	1.09062
230602	V4	P5B3	1	3.256	3.5815	0.342556	0.899504
230602	V4	P5B3	1	3.737	3.5815	0.342556	1.04801
230609	V4	P5B3	1	2.02	2.67233	0.339111	0.720415
230609	V4	P5B3	1	2.06	2.67233	0.339111	0.737559
230609	V4	P5B3	1	2.275	2.67233	0.339111	0.829706
220722	V4	P5B3	10	4.947	5.504	0.312	0.89272
220722	V4	P5B3	10	5.094	5.504	0.312	0.921032
220722	V4	P5B3	10	5.3	5.504	0.312	0.960709
230602	V4	P5B3	10	3.631	3.5815	0.342556	1.01528
230602	V4	P5B3	10	3.607	3.5815	0.342556	1.00787
230602	V4	P5B3	10	3.937	3.5815	0.342556	1.10976
230609	V4	P5B3	10	1.757	2.67233	0.339111	0.607696
230609	V4	P5B3	10	1.96	2.67233	0.339111	0.6947
230609	V4	P5B3	10	1.843	2.67233	0.339111	0.644555
220722	V4	P5B3	100	3.647	5.504	0.312	0.642334
220722	V4	P5B3	100	3.997	5.504	0.312	0.709746
220722	V4	P5B3	100	3.957	5.504	0.312	0.702042
230602	V4	P5B3	100	2.835	3.5815	0.342556	0.769524
230602	V4	P5B3	100	2.27	3.5815	0.342556	0.595084
230602	V4	P5B3	100	2.418	3.5815	0.342556	0.640778
230609	V4	P5B3	100	1.267	2.67233	0.339111	0.397686
230609	V4	P5B3	100	1.332	2.67233	0.339111	0.425544
230609	V4	P5B3	100	1.739	2.67233	0.339111	0.599981
220722	V5	No_Ab	0	6.229	5.94067	0.312	1.05123
220722	V5	No_Ab	0	6.021	5.94067	0.312	1.01427
220722	V5	No_Ab	0	5.572	5.94067	0.312	0.934502
230602	V5	No_Ab	0	3.97	3.90667	0.342556	1.01777
230602	V5	No_Ab	0	4.028	3.90667	0.342556	1.03404
230602	V5	No_Ab	0	3.722	3.90667	0.342556	0.948187
230609	V5	No_Ab	0	2.637	2.488	0.339111	1.06934
230609	V5	No_Ab	0	2.051	2.488	0.339111	0.796639
230609	V5	No_Ab	0	2.776	2.488	0.339111	1.13402
220722	V5	P5B3	1	5.795	5.94067	0.312	0.974121
220722	V5	P5B3	1	5.602	5.94067	0.312	0.939832
220722	V5	P5B3	1	6.184	5.94067	0.312	1.04323
230602	V5	P5B3	1	3.545	3.90667	0.342556	0.898525
230602	V5	P5B3	1	3.167	3.90667	0.342556	0.792468
230602	V5	P5B3	1	3.175	3.90667	0.342556	0.794713
230609	V5	P5B3	1	2.214	2.488	0.339111	0.872492
230609	V5	P5B3	1	2.248	2.488	0.339111	0.888314
230609	V5	P5B3	1	2.416	2.488	0.339111	0.966494
220722	V5	P5B3	10	5.392	5.94067	0.312	0.902523
220722	V5	P5B3	10	5.411	5.94067	0.312	0.905898
220722	V5	P5B3	10	5.422	5.94067	0.312	0.907853
230602	V5	P5B3	10	3.012	3.90667	0.342556	0.748979
230602	V5	P5B3	10	2.943	3.90667	0.342556	0.729619
230602	V5	P5B3	10	2.54	3.90667	0.342556	0.616548
230609	V5	P5B3	10	1.564	2.488	0.339111	0.57001
230609	V5	P5B3	10	2.104	2.488	0.339111	0.821303
230609	V5	P5B3	10	1.932	2.488	0.339111	0.741262
220722	V5	P5B3	100	4.485	5.94067	0.312	0.741383
220722	V5	P5B3	100	4.199	5.94067	0.312	0.690572
220722	V5	P5B3	100	4.605	5.94067	0.312	0.762703
230602	V5	P5B3	100	2.227	3.90667	0.342556	0.528728
230602	V5	P5B3	100	2.399	3.90667	0.342556	0.576987
230602	V5	P5B3	100	2.415	3.90667	0.342556	0.581476
230609	V5	P5B3	100	1.565	2.488	0.339111	0.570476
230609	V5	P5B3	100	1.594	2.488	0.339111	0.583971
230609	V13	B3	100	1.774	2.488	0.339111	0.667735
