# Supplementary material for: Neutralizing human monoclonal antibodies that target the PcrV component of the type III secretion system of Pseudomonas aeruginosa act through distinct mechanisms
Source: eLife. 2026 Feb 17;14:RP105195. doi: 10.7554/eLife.105195 (PMC12912723; doi:10.7554/eLife.105195)
Supplement: Figure 4—source data 1. [file elife-105195-fig4-data1.xlsx]

## Sheet: Fig 4A
Experiment	Ab	Concentration	Raw_cytotox	Mean_No_IgG	Mean_Non_infected	Norm_cytotox
231220	No_Ab	0	98.4087	99.8271	31.0479	0.979378
231220	No_Ab	0	101.282	99.8271	31.0479	1.02116
231220	No_Ab	0	99.79	99.8271	31.0479	0.999461
231215	No_Ab	0	193.115	205.163	66.1475	0.913331
231215	No_Ab	0	209.435	205.163	66.1475	1.03073
231215	No_Ab	0	212.94	205.163	66.1475	1.05594
231214	No_Ab	0	152.38	152.533	49.43	0.998513
231214	No_Ab	0	155.73	152.533	49.43	1.031
231214	No_Ab	0	149.49	152.533	49.43	0.970483
231220	P5B3	100	75.73	99.8271	31.0479	0.649646
231220	P5B3	100	71.2862	99.8271	31.0479	0.585037
231220	P5B3	100	70.8838	99.8271	31.0479	0.579185
231215	P5B3	100	166.925	205.163	66.1475	0.724935
231215	P5B3	100	185.87	205.163	66.1475	0.861215
231215	P5B3	100	164.49	205.163	66.1475	0.707419
231214	P5B3	100	133.72	152.533	49.43	0.817529
231214	P5B3	100	123.37	152.533	49.43	0.717145
231214	P5B3	100	128.495	152.533	49.43	0.766852
231220	P3D6	100	45.8038	99.8271	31.0479	0.214539
231220	P3D6	100	46.1525	99.8271	31.0479	0.21961
231220	P3D6	100	49.4062	99.8271	31.0479	0.266917
231215	P3D6	100	100.005	205.163	66.1475	0.243551
231215	P3D6	100	103.14	205.163	66.1475	0.266103
231215	P3D6	100	106.82	205.163	66.1475	0.292575
231214	P3D6	100	77.625	152.533	49.43	0.273464
231214	P3D6	100	78.43	152.533	49.43	0.281271
231214	P3D6	100	85.84	152.533	49.43	0.353141

## Sheet: Fig 4B
Experiment	Ab	Concentration	Raw_cytotox	Mean_No_IgG	Mean_Non_infected	Norm_cytotox
231220	No_Ab	0	98.4087	99.8271	31.0479	0.979378
231220	No_Ab	0	101.282	99.8271	31.0479	1.02116
231220	No_Ab	0	99.79	99.8271	31.0479	0.999461
231215	No_Ab	0	193.115	205.163	66.1475	0.913331
231215	No_Ab	0	209.435	205.163	66.1475	1.03073
231215	No_Ab	0	212.94	205.163	66.1475	1.05594
231214	No_Ab	0	152.38	152.533	49.43	0.998513
231214	No_Ab	0	155.73	152.533	49.43	1.031
231214	No_Ab	0	149.49	152.533	49.43	0.970483
231220	P3D6	0.01	85.37	99.8271	31.0479	0.789804
231220	P3D6	0.01	87.925	99.8271	31.0479	0.826952
231220	P3D6	0.01	85.3363	99.8271	31.0479	0.789314
231215	P3D6	0.01	186.125	205.163	66.1475	0.863049
231215	P3D6	0.01	195.15	205.163	66.1475	0.92797
231215	P3D6	0.01	195.66	205.163	66.1475	0.931638
231214	P3D6	0.01	134.41	152.533	49.43	0.824222
231214	P3D6	0.01	137.745	152.533	49.43	0.856568
231214	P3D6	0.01	133.035	152.533	49.43	0.810886
231220	P3D6	0.1	83.1762	99.8271	31.0479	0.757909
231220	P3D6	0.1	85.6412	99.8271	31.0479	0.793748
231220	P3D6	0.1	83.5962	99.8271	31.0479	0.764015
231215	P3D6	0.1	193.55	205.163	66.1475	0.91646
231215	P3D6	0.1	162.745	205.163	66.1475	0.694867
231215	P3D6	0.1	195.83	205.163	66.1475	0.932861
231214	P3D6	0.1	139.6	152.533	49.43	0.87456
231214	P3D6	0.1	136.055	152.533	49.43	0.840177
231214	P3D6	0.1	134.18	152.533	49.43	0.821991
231220	P3D6	1	77.4237	99.8271	31.0479	0.674272
231220	P3D6	1	80.0987	99.8271	31.0479	0.713164
231220	P3D6	1	81.485	99.8271	31.0479	0.733319
231215	P3D6	1	171.495	205.163	66.1475	0.757809
231215	P3D6	1	166.325	205.163	66.1475	0.720619
231215	P3D6	1	186.195	205.163	66.1475	0.863553
231214	P3D6	1	134.215	152.533	49.43	0.82233
231214	P3D6	1	137.845	152.533	49.43	0.857538
231214	P3D6	1	137.9	152.533	49.43	0.858071
231220	P3D6	10	58.485	99.8271	31.0479	0.398916
231220	P3D6	10	57.6275	99.8271	31.0479	0.386448
231220	P3D6	10	63.2638	99.8271	31.0479	0.468395
231215	P3D6	10	122.57	205.163	66.1475	0.405871
231215	P3D6	10	126.56	205.163	66.1475	0.434573
231215	P3D6	10	143.955	205.163	66.1475	0.559702
231214	P3D6	10	98.455	152.533	49.43	0.475494
231214	P3D6	10	98.805	152.533	49.43	0.478888
231214	P3D6	10	106.13	152.533	49.43	0.549934
231220	P3D6	100	45.8038	99.8271	31.0479	0.214539
231220	P3D6	100	46.1525	99.8271	31.0479	0.21961
231220	P3D6	100	49.4062	99.8271	31.0479	0.266917
231215	P3D6	100	100.005	205.163	66.1475	0.243551
231215	P3D6	100	103.14	205.163	66.1475	0.266103
231215	P3D6	100	106.82	205.163	66.1475	0.292575
231214	P3D6	100	77.625	152.533	49.43	0.273464
231214	P3D6	100	78.43	152.533	49.43	0.281271
231214	P3D6	100	85.84	152.533	49.43	0.353141

## Sheet: Fig 4C
Experiment	Ab	Concentration	Raw_cytotox	Mean_No_IgG	Mean_Non_infected	Norm_cytotox
231220	No_Ab	0	98.4087	99.8271	31.0479	0.979378
231220	No_Ab	0	101.282	99.8271	31.0479	1.02116
231220	No_Ab	0	99.79	99.8271	31.0479	0.999461
231215	No_Ab	0	193.115	205.163	66.1475	0.913331
231215	No_Ab	0	209.435	205.163	66.1475	1.03073
231215	No_Ab	0	212.94	205.163	66.1475	1.05594
231214	No_Ab	0	152.38	152.533	49.43	0.998513
231214	No_Ab	0	155.73	152.533	49.43	1.031
231214	No_Ab	0	149.49	152.533	49.43	0.970483
231220	P5B3	0.01	86.7725	99.8271	31.0479	0.810196
231220	P5B3	0.01	85.14	99.8271	31.0479	0.78646
231220	P5B3	0.01	85.0787	99.8271	31.0479	0.78557
231215	P5B3	0.01	176.66	205.163	66.1475	0.794963
231215	P5B3	0.01	194.37	205.163	66.1475	0.922359
231215	P5B3	0.01	186.59	205.163	66.1475	0.866394
231214	P5B3	0.01	135.07	152.533	49.43	0.830623
231214	P5B3	0.01	135.765	152.533	49.43	0.837364
231214	P5B3	0.01	133.87	152.533	49.43	0.818984
231220	P5B3	0.1	82.8625	99.8271	31.0479	0.753347
231220	P5B3	0.1	82.685	99.8271	31.0479	0.750766
231220	P5B3	0.1	80.4237	99.8271	31.0479	0.717889
231215	P5B3	0.1	171.72	205.163	66.1475	0.759428
231215	P5B3	0.1	183.27	205.163	66.1475	0.842512
231215	P5B3	0.1	156.72	205.163	66.1475	0.651527
231214	P5B3	0.1	137.41	152.533	49.43	0.853319
231214	P5B3	0.1	133.15	152.533	49.43	0.812001
231214	P5B3	0.1	135.91	152.533	49.43	0.83877
231220	P5B3	1	78.0575	99.8271	31.0479	0.683486
231220	P5B3	1	75.725	99.8271	31.0479	0.649573
231220	P5B3	1	75.945	99.8271	31.0479	0.652772
231215	P5B3	1	155.57	205.163	66.1475	0.643254
231215	P5B3	1	177.495	205.163	66.1475	0.80097
231215	P5B3	1	159.93	205.163	66.1475	0.674617
231214	P5B3	1	130.03	152.533	49.43	0.78174
231214	P5B3	1	123.77	152.533	49.43	0.721024
231214	P5B3	1	138.225	152.533	49.43	0.861223
231220	P5B3	10	80.2475	99.8271	31.0479	0.715327
231220	P5B3	10	76.25	99.8271	31.0479	0.657206
231220	P5B3	10	77.9363	99.8271	31.0479	0.681723
231215	P5B3	10	170.915	205.163	66.1475	0.753637
231215	P5B3	10	163.605	205.163	66.1475	0.701053
231215	P5B3	10	162.775	205.163	66.1475	0.695083
231214	P5B3	10	136.915	152.533	49.43	0.848518
231214	P5B3	10	133.29	152.533	49.43	0.813359
231214	P5B3	10	127.55	152.533	49.43	0.757686
231220	P5B3	100	75.73	99.8271	31.0479	0.649646
231220	P5B3	100	71.2862	99.8271	31.0479	0.585037
231220	P5B3	100	70.8838	99.8271	31.0479	0.579185
231215	P5B3	100	166.925	205.163	66.1475	0.724935
231215	P5B3	100	185.87	205.163	66.1475	0.861215
231215	P5B3	100	164.49	205.163	66.1475	0.707419
231214	P5B3	100	133.72	152.533	49.43	0.817529
231214	P5B3	100	123.37	152.533	49.43	0.717145
231214	P5B3	100	128.495	152.533	49.43	0.766852
