# Supplementary material for: Neutralizing human monoclonal antibodies that target the PcrV component of the type III secretion system of Pseudomonas aeruginosa act through distinct mechanisms
Source: eLife. 2026 Feb 17;14:RP105195. doi: 10.7554/eLife.105195 (PMC12912723; doi:10.7554/eLife.105195)
Supplement: Figure 6—source data 1. [file elife-105195-fig6-data1.xlsx]

## Sheet: Medi3902
Cytotoxicity								Injection
Experiment	Ab	Concentration	Raw_cytotox	Mean_No_IgG	Mean_Non_infected	Norm_cytotox		Experiment	Ab	Concentration	Raw_injection	Mean_No_IgG	Mean_Non_infected	Norm_injection
231220	No_Ab	0	98.4087	99.8271	31.0479	0.979378		20122023	No_Ab	0	16.36	16.1733	1.00167	1.0123
231220	No_Ab	0	101.282	99.8271	31.0479	1.02116		20122023	No_Ab	0	16.88	16.1733	1.00167	1.04658
231220	No_Ab	0	99.79	99.8271	31.0479	0.999461		20122023	No_Ab	0	16.56	16.1733	1.00167	1.02549
231215	No_Ab	0	193.115	205.163	66.1475	0.913331		20122023	No_Ab	0	14.75	16.1733	1.00167	0.906185
231215	No_Ab	0	209.435	205.163	66.1475	1.03073		20122023	No_Ab	0	15.67	16.1733	1.00167	0.966824
231215	No_Ab	0	212.94	205.163	66.1475	1.05594		20122023	No_Ab	0	16.82	16.1733	1.00167	1.04262
231214	No_Ab	0	152.38	152.533	49.43	0.998513		15122023	No_Ab	0	12.89	15.7217	1.00167	0.807631
231214	No_Ab	0	155.73	152.533	49.43	1.031		15122023	No_Ab	0	16.28	15.7217	1.00167	1.03793
231214	No_Ab	0	149.49	152.533	49.43	0.970483		15122023	No_Ab	0	16.27	15.7217	1.00167	1.03725
231220	Medi3902	0.01	93.5037	99.8271	31.0479	0.908063		15122023	No_Ab	0	14.57	15.7217	1.00167	0.921762
231220	Medi3902	0.01	90.3863	99.8271	31.0479	0.862737		15122023	No_Ab	0	16.08	15.7217	1.00167	1.02434
231220	Medi3902	0.01	86.2687	99.8271	31.0479	0.802872		15122023	No_Ab	0	18.24	15.7217	1.00167	1.17108
231215	Medi3902	0.01	200.455	205.163	66.1475	0.966131		20122023	Medi3902	0.01	14.45	16.1733	1.00167	0.886411
231215	Medi3902	0.01	188.97	205.163	66.1475	0.883514		20122023	Medi3902	0.01	15.57	16.1733	1.00167	0.960233
231215	Medi3902	0.01	183.775	205.163	66.1475	0.846145		20122023	Medi3902	0.01	14.97	16.1733	1.00167	0.920685
231214	Medi3902	0.01	149.385	152.533	49.43	0.969464		15122023	Medi3902	0.01	16.23	15.7217	1.00167	1.03453
231214	Medi3902	0.01	139.42	152.533	49.43	0.872814		15122023	Medi3902	0.01	14.34	15.7217	1.00167	0.906137
231220	Medi3902	0.1	92.9175	99.8271	31.0479	0.89954		15122023	Medi3902	0.01	17.19	15.7217	1.00167	1.09975
231220	Medi3902	0.1	85.7225	99.8271	31.0479	0.794929		20122023	Medi3902	0.1	8.75	16.1733	1.00167	0.510711
231220	Medi3902	0.1	79.2725	99.8271	31.0479	0.701151		20122023	Medi3902	0.1	10.59	16.1733	1.00167	0.631989
231215	Medi3902	0.1	192.045	205.163	66.1475	0.905634		20122023	Medi3902	0.1	8.39	16.1733	1.00167	0.486982
231215	Medi3902	0.1	183.605	205.163	66.1475	0.844922		15122023	Medi3902	0.1	9.12	15.7217	1.00167	0.551517
231215	Medi3902	0.1	174.245	205.163	66.1475	0.777591		15122023	Medi3902	0.1	8.24	15.7217	1.00167	0.491735
231214	Medi3902	0.1	141.56	152.533	49.43	0.89357		15122023	Medi3902	0.1	7.51	15.7217	1.00167	0.442142
231214	Medi3902	0.1	128.585	152.533	49.43	0.767725		20122023	Medi3902	1	2.9	16.1733	1.00167	0.125124
231220	Medi3902	1	90.945	99.8271	31.0479	0.870861		20122023	Medi3902	1	4.3	16.1733	1.00167	0.217401
231220	Medi3902	1	80.8925	99.8271	31.0479	0.724705		20122023	Medi3902	1	3.37	16.1733	1.00167	0.156102
231220	Medi3902	1	74.6088	99.8271	31.0479	0.633343		15122023	Medi3902	1	2.63	15.7217	1.00167	0.11062
231215	Medi3902	1	183.8	205.163	66.1475	0.846324		15122023	Medi3902	1	2.53	15.7217	1.00167	0.103827
231215	Medi3902	1	177.73	205.163	66.1475	0.80266		15122023	Medi3902	1	2.41	15.7217	1.00167	0.0956748
231215	Medi3902	1	183.84	205.163	66.1475	0.846612		20122023	Medi3902	10	3.06	16.1733	1.00167	0.13567
231214	Medi3902	1	134.85	152.533	49.43	0.828489		20122023	Medi3902	10	2.36	16.1733	1.00167	0.0895309
231214	Medi3902	1	120.095	152.533	49.43	0.68538		20122023	Medi3902	10	2.6	16.1733	1.00167	0.10535
231220	Medi3902	10	90.625	99.8271	31.0479	0.866208		15122023	Medi3902	10	1.83	15.7217	1.00167	0.0562726
231220	Medi3902	10	74.6975	99.8271	31.0479	0.634634		15122023	Medi3902	10	1.92	15.7217	1.00167	0.0623868
231220	Medi3902	10	71.465	99.8271	31.0479	0.587636		15122023	Medi3902	10	2	15.7217	1.00167	0.0678216
231215	Medi3902	10	164.13	205.163	66.1475	0.70483		20122023	Medi3902	100	1.91	16.1733	1.00167	0.0598704
231215	Medi3902	10	136.12	205.163	66.1475	0.503342		20122023	Medi3902	100	2.51	16.1733	1.00167	0.0994178
231215	Medi3902	10	139.89	205.163	66.1475	0.530461		20122023	Medi3902	100	2.07	16.1733	1.00167	0.0704163
231214	Medi3902	10	117.725	152.533	49.43	0.662394		15122023	Medi3902	100	2.12	15.7217	1.00167	0.0759737
231214	Medi3902	10	110.665	152.533	49.43	0.593919		15122023	Medi3902	100	2.06	15.7217	1.00167	0.0718976
231220	Medi3902	100	95.165	99.8271	31.0479	0.932217		15122023	Medi3902	100	1.92	15.7217	1.00167	0.0623868
231220	Medi3902	100	82.4537	99.8271	31.0479	0.747404
231220	Medi3902	100	74.5825	99.8271	31.0479	0.632962
231215	Medi3902	100	172.47	205.163	66.1475	0.764823
231215	Medi3902	100	166.565	205.163	66.1475	0.722346
231215	Medi3902	100	148.36	205.163	66.1475	0.591389
231214	Medi3902	100	143.585	152.533	49.43	0.91321
231214	Medi3902	100	138.34	152.533	49.43	0.862339
231214	Medi3902	100	125.975	152.533	49.43	0.742411

## Sheet: 30-B8
Cytotoxicity								Injection
Experiment	Ab	Concentration	Raw_cytotox	Mean_No_IgG	Mean_Non_infected	Norm_cytotox		Experiment	Ab	Concentration	Raw_injection	Mean_No_IgG	Mean_Non_infected	Norm_injection
6032024	No_Ab	0	94.69	101.978	15.6525	0.915572		12032024	No_Ab	0	17.218	16.6715	1	1.03488
6032024	No_Ab	0	108.535	101.978	15.6525	1.07595		12032024	No_Ab	0	16.1046	16.6715	1	0.963826
6032024	No_Ab	0	102.71	101.978	15.6525	1.00848		12032024	No_Ab	0	16.6918	16.6715	1	1.0013
12042024	No_Ab	0	48.335	42.025	13.9067	1.22441		19032024	No_Ab	0	37.1547	40.4343	1.05706	0.916713
12042024	No_Ab	0	38.925	42.025	13.9067	0.889752		19032024	No_Ab	0	40.9461	40.4343	1.05706	1.013
12042024	No_Ab	0	38.815	42.025	13.9067	0.88584		19032024	No_Ab	0	43.2021	40.4343	1.05706	1.07029
14032024	No_Ab	0	82.72	86.5667	30.8733	0.930931		9042024	No_Ab	0	22.4325	23.1639	1.01498	0.96698
14032024	No_Ab	0	87.465	86.5667	30.8733	1.01613		9042024	No_Ab	0	22.9008	23.1639	1.01498	0.988121
14032024	No_Ab	0	89.515	86.5667	30.8733	1.05294		9042024	No_Ab	0	24.1583	23.1639	1.01498	1.0449
15032024	No_Ab	0	81.13	81.13	9.99056	1		12032024	30B8	0.001	17.676	16.6715	1	1.0641
12042024	30B8	0.001	47.09	42.025	13.9067	1.18013		12032024	30B8	0.001	16.4223	16.6715	1	0.984098
12042024	30B8	0.001	43.55	42.025	13.9067	1.05424		12032024	30B8	0.001	16.9301	16.6715	1	1.0165
12042024	30B8	0.001	39.675	42.025	13.9067	0.916425		19032024	30B8	0.001	34.4001	40.4343	1.05706	0.846758
14032024	30B8	0.001	82.72	86.5667	30.8733	0.930931		19032024	30B8	0.001	36.9058	40.4343	1.05706	0.910393
14032024	30B8	0.001	87.465	86.5667	30.8733	1.01613		19032024	30B8	0.001	39.2042	40.4343	1.05706	0.968761
14032024	30B8	0.001	89.515	86.5667	30.8733	1.05294		9042024	30B8	0.001	18.8867	23.1639	1.01498	0.80689
15032024	30B8	0.001	81.13	81.13	9.99056	1		9042024	30B8	0.001	19.1594	23.1639	1.01498	0.819203
6032024	30B8	0.01	93.505	101.978	15.6525	0.901845		9042024	30B8	0.001	21.651	23.1639	1.01498	0.931694
6032024	30B8	0.01	76.21	101.978	15.6525	0.701499		12032024	30B8	0.01	12.7325	16.6715	1	0.748656
6032024	30B8	0.01	80.38	101.978	15.6525	0.749805		12032024	30B8	0.01	12.7364	16.6715	1	0.748904
12042024	30B8	0.01	38.665	42.025	13.9067	0.880505		12032024	30B8	0.01	12.3639	16.6715	1	0.725131
12042024	30B8	0.01	44.57	42.025	13.9067	1.09051		19032024	30B8	0.01	28.0611	40.4343	1.05706	0.685777
12042024	30B8	0.01	39.13	42.025	13.9067	0.897042		19032024	30B8	0.01	28.8275	40.4343	1.05706	0.705242
14032024	30B8	0.01	72.15	86.5667	30.8733	0.741142		19032024	30B8	0.01	30.7976	40.4343	1.05706	0.755272
14032024	30B8	0.01	68.315	86.5667	30.8733	0.672283		9042024	30B8	0.01	13.8816	23.1639	1.01498	0.580913
14032024	30B8	0.01	78.26	86.5667	30.8733	0.85085		9042024	30B8	0.01	14.1824	23.1639	1.01498	0.594497
15032024	30B8	0.01	61.985	81.13	9.99056	0.730881		9042024	30B8	0.01	14.0833	23.1639	1.01498	0.590021
15032024	30B8	0.01	64.625	81.13	9.99056	0.767991		12032024	30B8	0.1	4.81325	16.6715	1	0.243324
6032024	30B8	0.1	86.32	101.978	15.6525	0.818614		12032024	30B8	0.1	4.68623	16.6715	1	0.235219
6032024	30B8	0.1	73.91	101.978	15.6525	0.674856		12032024	30B8	0.1	4.81092	16.6715	1	0.243175
6032024	30B8	0.1	75.39	101.978	15.6525	0.692		19032024	30B8	0.1	5.29779	40.4343	1.05706	0.107695
12042024	30B8	0.1	38.94	42.025	13.9067	0.890285		19032024	30B8	0.1	5.41479	40.4343	1.05706	0.110666
12042024	30B8	0.1	34.215	42.025	13.9067	0.722245		19032024	30B8	0.1	5.92841	40.4343	1.05706	0.12371
12042024	30B8	0.1	32.465	42.025	13.9067	0.660008		9042024	30B8	0.1	3.52589	23.1639	1.01498	0.113365
14032024	30B8	0.1	69.93	86.5667	30.8733	0.701281		9042024	30B8	0.1	3.76013	23.1639	1.01498	0.123941
14032024	30B8	0.1	64.135	86.5667	30.8733	0.597229		9042024	30B8	0.1	3.60969	23.1639	1.01498	0.117148
14032024	30B8	0.1	61.51	86.5667	30.8733	0.550096		12032024	30B8	1	3.50981	16.6715	1	0.160151
15032024	30B8	0.1	56.85	81.13	9.99056	0.658698		12032024	30B8	1	3.50323	16.6715	1	0.159732
15032024	30B8	0.1	57.105	81.13	9.99056	0.662283		12032024	30B8	1	3.98637	16.6715	1	0.190561
15032024	30B8	0.1	58.31	81.13	9.99056	0.679222		19032024	30B8	1	4.18664	40.4343	1.05706	0.0794767
6032024	30B8	1	66.035	101.978	15.6525	0.583632		19032024	30B8	1	4.25339	40.4343	1.05706	0.0811719
6032024	30B8	1	60.7	101.978	15.6525	0.521831		19032024	30B8	1	3.89084	40.4343	1.05706	0.0719647
6032024	30B8	1	63.36	101.978	15.6525	0.552645		9042024	30B8	1	2.80888	23.1639	1.01498	0.0809925
12042024	30B8	1	33.435	42.025	13.9067	0.694505		9042024	30B8	1	2.95863	23.1639	1.01498	0.0877537
12042024	30B8	1	31.27	42.025	13.9067	0.617509		9042024	30B8	1	3.05953	23.1639	1.01498	0.0923093
12042024	30B8	1	29.72	42.025	13.9067	0.562385
14032024	30B8	1	57.42	86.5667	30.8733	0.476658
14032024	30B8	1	52.93	86.5667	30.8733	0.396038
14032024	30B8	1	62.965	86.5667	30.8733	0.576221
15032024	30B8	1	49.665	81.13	9.99056	0.5577
15032024	30B8	1	49.545	81.13	9.99056	0.556013
15032024	30B8	1	46.41	81.13	9.99056	0.511944
6032024	30B8	10	51.195	101.978	15.6525	0.411725
6032024	30B8	10	42.86	101.978	15.6525	0.315172
6032024	30B8	10	47.145	101.978	15.6525	0.36481
12042024	30B8	10	31.13	42.025	13.9067	0.61253
12042024	30B8	10	28.365	42.025	13.9067	0.514196
12042024	30B8	10	29.505	42.025	13.9067	0.554739
14032024	30B8	10	60.78	86.5667	30.8733	0.536988
14032024	30B8	10	51.625	86.5667	30.8733	0.372606
14032024	30B8	10	55.64	86.5667	30.8733	0.444697
15032024	30B8	10	44.85	81.13	9.99056	0.490016
15032024	30B8	10	45.79	81.13	9.99056	0.503229
15032024	30B8	10	47.115	81.13	9.99056	0.521855
6032024	30B8	100	44.975	101.978	15.6525	0.339672
6032024	30B8	100	39.94	101.978	15.6525	0.281347
6032024	30B8	100	41.22	101.978	15.6525	0.296174
12042024	30B8	100	30.835	42.025	13.9067	0.602039
12042024	30B8	100	31.165	42.025	13.9067	0.613775
12042024	30B8	100	34.455	42.025	13.9067	0.730781
14032024	30B8	100	60.65	86.5667	30.8733	0.534654
14032024	30B8	100	57.685	86.5667	30.8733	0.481416
14032024	30B8	100	55.235	86.5667	30.8733	0.437425

## Sheet: P3D6
Cytotoxicity								Injection
Experiment	Ab	Concentration	Raw_cytotox	Mean_No_IgG	Mean_Non_infected	Norm_cytotox		Experiment	Ab	Concentration	Raw_injection	Mean_No_IgG	Mean_Non_infected	Norm_injection
231220	No_Ab	0	98.4087	99.8271	31.0479	0.979378		20122023	V1	No_Ab	0	16.36	16.1733	1.00167	1.0123
231220	No_Ab	0	101.282	99.8271	31.0479	1.02116		20122023	V1	No_Ab	0	16.88	16.1733	1.00167	1.04658
231220	No_Ab	0	99.79	99.8271	31.0479	0.999461		20122023	V1	No_Ab	0	16.56	16.1733	1.00167	1.02549
231215	No_Ab	0	193.115	205.163	66.1475	0.913331		20122023	V1	No_Ab	0	14.75	16.1733	1.00167	0.906185
231215	No_Ab	0	209.435	205.163	66.1475	1.03073		20122023	V1	No_Ab	0	15.67	16.1733	1.00167	0.966824
231215	No_Ab	0	212.94	205.163	66.1475	1.05594		20122023	V1	No_Ab	0	16.82	16.1733	1.00167	1.04262
231214	No_Ab	0	152.38	152.533	49.43	0.998513		15122023	V1	No_Ab	0	12.89	15.7217	1.00167	0.807631
231214	No_Ab	0	155.73	152.533	49.43	1.031		15122023	V1	No_Ab	0	16.28	15.7217	1.00167	1.03793
231214	No_Ab	0	149.49	152.533	49.43	0.970483		15122023	V1	No_Ab	0	16.27	15.7217	1.00167	1.03725
231220	P3D6	0.01	85.37	99.8271	31.0479	0.789804		15122023	V1	No_Ab	0	14.57	15.7217	1.00167	0.921762
231220	P3D6	0.01	87.925	99.8271	31.0479	0.826952		15122023	V1	No_Ab	0	16.08	15.7217	1.00167	1.02434
231220	P3D6	0.01	85.3363	99.8271	31.0479	0.789314		15122023	V1	No_Ab	0	18.24	15.7217	1.00167	1.17108
231215	P3D6	0.01	186.125	205.163	66.1475	0.863049		20122023	V1	P3D6	0.01	15.77	16.1733	1.00167	0.973415
231215	P3D6	0.01	195.15	205.163	66.1475	0.92797		20122023	V1	P3D6	0.01	17.68	16.1733	1.00167	1.09931
231215	P3D6	0.01	195.66	205.163	66.1475	0.931638		20122023	V1	P3D6	0.01	16.03	16.1733	1.00167	0.990553
231214	P3D6	0.01	134.41	152.533	49.43	0.824222		15122023	V1	P3D6	0.01	17.58	15.7217	1.00167	1.12625
231214	P3D6	0.01	137.745	152.533	49.43	0.856568		15122023	V1	P3D6	0.01	16.32	15.7217	1.00167	1.04065
231214	P3D6	0.01	133.035	152.533	49.43	0.810886		15122023	V1	P3D6	0.01	17.43	15.7217	1.00167	1.11606
231220	P3D6	0.1	83.1762	99.8271	31.0479	0.757909		20122023	V1	P3D6	0.1	17.04	16.1733	1.00167	1.05712
231220	P3D6	0.1	85.6412	99.8271	31.0479	0.793748		20122023	V1	P3D6	0.1	17.16	16.1733	1.00167	1.06503
231220	P3D6	0.1	83.5962	99.8271	31.0479	0.764015		20122023	V1	P3D6	0.1	16.51	16.1733	1.00167	1.02219
231215	P3D6	0.1	193.55	205.163	66.1475	0.91646		15122023	V1	P3D6	0.1	16.85	15.7217	1.00167	1.07665
231215	P3D6	0.1	162.745	205.163	66.1475	0.694867		15122023	V1	P3D6	0.1	15.77	15.7217	1.00167	1.00328
231215	P3D6	0.1	195.83	205.163	66.1475	0.932861		15122023	V1	P3D6	0.1	16.12	15.7217	1.00167	1.02706
231214	P3D6	0.1	139.6	152.533	49.43	0.87456		20122023	V1	P3D6	1	12.51	16.1733	1.00167	0.758541
231214	P3D6	0.1	136.055	152.533	49.43	0.840177		20122023	V1	P3D6	1	12.29	16.1733	1.00167	0.74404
231214	P3D6	0.1	134.18	152.533	49.43	0.821991		20122023	V1	P3D6	1	13.7	16.1733	1.00167	0.836977
231220	P3D6	1	77.4237	99.8271	31.0479	0.674272		15122023	V1	P3D6	1	11.68	15.7217	1.00167	0.72543
231220	P3D6	1	80.0987	99.8271	31.0479	0.713164		15122023	V1	P3D6	1	12.45	15.7217	1.00167	0.77774
231220	P3D6	1	81.485	99.8271	31.0479	0.733319		15122023	V1	P3D6	1	11.86	15.7217	1.00167	0.737659
231215	P3D6	1	171.495	205.163	66.1475	0.757809		20122023	V1	P3D6	10	6.91	16.1733	1.00167	0.389432
231215	P3D6	1	166.325	205.163	66.1475	0.720619		20122023	V1	P3D6	10	6.33	16.1733	1.00167	0.351203
231215	P3D6	1	186.195	205.163	66.1475	0.863553		20122023	V1	P3D6	10	5.8	16.1733	1.00167	0.316269
231214	P3D6	1	134.215	152.533	49.43	0.82233		15122023	V1	P3D6	10	5.03	15.7217	1.00167	0.273664
231214	P3D6	1	137.845	152.533	49.43	0.857538		15122023	V1	P3D6	10	4.93	15.7217	1.00167	0.26687
231214	P3D6	1	137.9	152.533	49.43	0.858071		15122023	V1	P3D6	10	3.81	15.7217	1.00167	0.190784
231220	P3D6	10	58.485	99.8271	31.0479	0.398916		20122023	V1	P3D6	100	2.37	16.1733	1.00167	0.09019
231220	P3D6	10	57.6275	99.8271	31.0479	0.386448		20122023	V1	P3D6	100	2.19	16.1733	1.00167	0.0783258
231220	P3D6	10	63.2638	99.8271	31.0479	0.468395		20122023	V1	P3D6	100	2.66	16.1733	1.00167	0.109305
231215	P3D6	10	122.57	205.163	66.1475	0.405871		15122023	V1	P3D6	100	2.62	15.7217	1.00167	0.109941
231215	P3D6	10	126.56	205.163	66.1475	0.434573		15122023	V1	P3D6	100	2.42	15.7217	1.00167	0.0963542
231215	P3D6	10	143.955	205.163	66.1475	0.559702		15122023	V1	P3D6	100	2.63	15.7217	1.00167	0.11062
231214	P3D6	10	98.455	152.533	49.43	0.475494
231214	P3D6	10	98.805	152.533	49.43	0.478888
231214	P3D6	10	106.13	152.533	49.43	0.549934
231220	P3D6	100	45.8038	99.8271	31.0479	0.214539
231220	P3D6	100	46.1525	99.8271	31.0479	0.21961
231220	P3D6	100	49.4062	99.8271	31.0479	0.266917
231215	P3D6	100	100.005	205.163	66.1475	0.243551
231215	P3D6	100	103.14	205.163	66.1475	0.266103
231215	P3D6	100	106.82	205.163	66.1475	0.292575
231214	P3D6	100	77.625	152.533	49.43	0.273464
231214	P3D6	100	78.43	152.533	49.43	0.281271
231214	P3D6	100	85.84	152.533	49.43	0.353141

## Sheet: Fig_supp
Experiment	Variant	Ab	Concentration	Raw_injection	Mean_No_IgG	Mean_Non_infected	Norm_injection
12032024	V1	No_Ab	0	17.218	16.6715	1	1.03488
12032024	V1	No_Ab	0	16.1046	16.6715	1	0.963826
12032024	V1	No_Ab	0	16.6918	16.6715	1	1.0013
19032024	V1	No_Ab	0	37.1547	40.4343	1.05706	0.916713
19032024	V1	No_Ab	0	40.9461	40.4343	1.05706	1.013
19032024	V1	No_Ab	0	43.2021	40.4343	1.05706	1.07029
9042024	V1	No_Ab	0	22.4325	23.1639	1.01498	0.96698
9042024	V1	No_Ab	0	22.9008	23.1639	1.01498	0.988121
9042024	V1	No_Ab	0	24.1583	23.1639	1.01498	1.0449
12032024	V1	30B8	0.001	17.676	16.6715	1	1.0641
12032024	V1	30B8	0.001	16.4223	16.6715	1	0.984098
12032024	V1	30B8	0.001	16.9301	16.6715	1	1.0165
19032024	V1	30B8	0.001	34.4001	40.4343	1.05706	0.846758
19032024	V1	30B8	0.001	36.9058	40.4343	1.05706	0.910393
19032024	V1	30B8	0.001	39.2042	40.4343	1.05706	0.968761
9042024	V1	30B8	0.001	18.8867	23.1639	1.01498	0.80689
9042024	V1	30B8	0.001	19.1594	23.1639	1.01498	0.819203
9042024	V1	30B8	0.001	21.651	23.1639	1.01498	0.931694
12032024	V1	30B8	0.01	12.7325	16.6715	1	0.748656
12032024	V1	30B8	0.01	12.7364	16.6715	1	0.748904
12032024	V1	30B8	0.01	12.3639	16.6715	1	0.725131
19032024	V1	30B8	0.01	28.0611	40.4343	1.05706	0.685777
19032024	V1	30B8	0.01	28.8275	40.4343	1.05706	0.705242
19032024	V1	30B8	0.01	30.7976	40.4343	1.05706	0.755272
9042024	V1	30B8	0.01	13.8816	23.1639	1.01498	0.580913
9042024	V1	30B8	0.01	14.1824	23.1639	1.01498	0.594497
9042024	V1	30B8	0.01	14.0833	23.1639	1.01498	0.590021
12032024	V1	30B8	0.1	4.81325	16.6715	1	0.243324
12032024	V1	30B8	0.1	4.68623	16.6715	1	0.235219
12032024	V1	30B8	0.1	4.81092	16.6715	1	0.243175
19032024	V1	30B8	0.1	5.29779	40.4343	1.05706	0.107695
19032024	V1	30B8	0.1	5.41479	40.4343	1.05706	0.110666
19032024	V1	30B8	0.1	5.92841	40.4343	1.05706	0.12371
9042024	V1	30B8	0.1	3.52589	23.1639	1.01498	0.113365
9042024	V1	30B8	0.1	3.76013	23.1639	1.01498	0.123941
9042024	V1	30B8	0.1	3.60969	23.1639	1.01498	0.117148
12032024	V1	30B8	1	3.50981	16.6715	1	0.160151
12032024	V1	30B8	1	3.50323	16.6715	1	0.159732
12032024	V1	30B8	1	3.98637	16.6715	1	0.190561
19032024	V1	30B8	1	4.18664	40.4343	1.05706	0.0794767
19032024	V1	30B8	1	4.25339	40.4343	1.05706	0.0811719
19032024	V1	30B8	1	3.89084	40.4343	1.05706	0.0719647
9042024	V1	30B8	1	2.80888	23.1639	1.01498	0.0809925
9042024	V1	30B8	1	2.95863	23.1639	1.01498	0.0877537
9042024	V1	30B8	1	3.05953	23.1639	1.01498	0.0923093
19032024	V2	No_Ab	0	42.5222	43.7449	1.05706	0.971356
19032024	V2	No_Ab	0	44.5034	43.7449	1.05706	1.01777
19032024	V2	No_Ab	0	44.2092	43.7449	1.05706	1.01088
29032024	V2	No_Ab	0	45.0852	45.1629	1.04992	0.998237
29032024	V2	No_Ab	0	42.8056	45.1629	1.04992	0.946561
29032024	V2	No_Ab	0	47.5981	45.1629	1.04992	1.0552
9042024	V2	No_Ab	0	30.6477	30.9176	1.01498	0.990972
9042024	V2	No_Ab	0	30.7251	30.9176	1.01498	0.993563
9042024	V2	No_Ab	0	31.3801	30.9176	1.01498	1.01547
19032024	V2	30B8	0.001	41.289	43.7449	1.05706	0.94247
19032024	V2	30B8	0.001	43.3146	43.7449	1.05706	0.989919
19032024	V2	30B8	0.001	43.0905	43.7449	1.05706	0.984671
29032024	V2	30B8	0.001	28.3154	45.1629	1.04992	0.618083
29032024	V2	30B8	0.001	34.2758	45.1629	1.04992	0.7532
29032024	V2	30B8	0.001	31.9026	45.1629	1.04992	0.699402
9042024	V2	30B8	0.001	24.777	30.9176	1.01498	0.794647
9042024	V2	30B8	0.001	26.2418	30.9176	1.01498	0.84363
9042024	V2	30B8	0.001	26.3254	30.9176	1.01498	0.846428
19032024	V2	30B8	0.01	32.981	43.7449	1.05706	0.747846
19032024	V2	30B8	0.01	32.4921	43.7449	1.05706	0.736393
19032024	V2	30B8	0.01	35.4028	43.7449	1.05706	0.80458
29032024	V2	30B8	0.01	18.2634	45.1629	1.04992	0.390214
29032024	V2	30B8	0.01	17.3332	45.1629	1.04992	0.369127
29032024	V2	30B8	0.01	19.5477	45.1629	1.04992	0.419328
9042024	V2	30B8	0.01	15.8272	30.9176	1.01498	0.495349
9042024	V2	30B8	0.01	18.6249	30.9176	1.01498	0.58891
9042024	V2	30B8	0.01	18.3643	30.9176	1.01498	0.580193
19032024	V2	30B8	0.1	7.46337	43.7449	1.05706	0.150073
19032024	V2	30B8	0.1	6.93657	43.7449	1.05706	0.137733
19032024	V2	30B8	0.1	6.71725	43.7449	1.05706	0.132595
29032024	V2	30B8	0.1	6.95485	45.1629	1.04992	0.133859
29032024	V2	30B8	0.1	7.00815	45.1629	1.04992	0.135067
29032024	V2	30B8	0.1	6.7689	45.1629	1.04992	0.129644
9042024	V2	30B8	0.1	4.29241	30.9176	1.01498	0.109603
9042024	V2	30B8	0.1	7.24738	30.9176	1.01498	0.208423
9042024	V2	30B8	0.1	3.48438	30.9176	1.01498	0.0825812
19032024	V2	30B8	1	5.1276	43.7449	1.05706	0.095356
19032024	V2	30B8	1	4.95503	43.7449	1.05706	0.0913132
19032024	V2	30B8	1	5.0059	43.7449	1.05706	0.092505
29032024	V2	30B8	1	3.92783	45.1629	1.04992	0.0652394
29032024	V2	30B8	1	6.32396	45.1629	1.04992	0.119557
29032024	V2	30B8	1	5.69205	45.1629	1.04992	0.105233
9042024	V2	30B8	1	3.78312	30.9176	1.01498	0.0925716
9042024	V2	30B8	1	3.63643	30.9176	1.01498	0.0876661
9042024	V2	30B8	1	4.0946	30.9176	1.01498	0.102988
19032024	V3	No_Ab	0	41.2428	41.1486	1.05706	1.00235
19032024	V3	No_Ab	0	41.1798	41.1486	1.05706	1.00078
19032024	V3	No_Ab	0	41.0233	41.1486	1.05706	0.996874
29032024	V3	No_Ab	0	41.7198	43.5086	1.04992	0.957868
29032024	V3	No_Ab	0	47.0017	43.5086	1.04992	1.08227
29032024	V3	No_Ab	0	41.8044	43.5086	1.04992	0.959862
9042024	V3	No_Ab	0	25.4066	26.6609	1.01498	0.951093
9042024	V3	No_Ab	0	27.2454	26.6609	1.01498	1.02279
9042024	V3	No_Ab	0	27.3307	26.6609	1.01498	1.02612
19032024	V3	30B8	0.001	41.4319	41.1486	1.05706	1.00707
19032024	V3	30B8	0.001	39.6062	41.1486	1.05706	0.961526
19032024	V3	30B8	0.001	39.1444	41.1486	1.05706	0.950009
29032024	V3	30B8	0.001	27.3321	43.5086	1.04992	0.619006
29032024	V3	30B8	0.001	25.8688	43.5086	1.04992	0.584542
9042024	V3	30B8	0.001	21.6609	26.6609	1.01498	0.805039
9042024	V3	30B8	0.001	22.3721	26.6609	1.01498	0.83277
9042024	V3	30B8	0.001	21.4209	26.6609	1.01498	0.79568
19032024	V3	30B8	0.01	32.3044	41.1486	1.05706	0.7794
19032024	V3	30B8	0.01	33.0225	41.1486	1.05706	0.797311
19032024	V3	30B8	0.01	33.8334	41.1486	1.05706	0.817537
29032024	V3	30B8	0.01	13.6311	43.5086	1.04992	0.296315
29032024	V3	30B8	0.01	16.5155	43.5086	1.04992	0.36425
29032024	V3	30B8	0.01	16.2093	43.5086	1.04992	0.357037
9042024	V3	30B8	0.01	13.7248	26.6609	1.01498	0.495589
9042024	V3	30B8	0.01	14.594	26.6609	1.01498	0.529482
9042024	V3	30B8	0.01	13.6601	26.6609	1.01498	0.493065
19032024	V3	30B8	0.1	5.75301	41.1486	1.05706	0.117131
19032024	V3	30B8	0.1	5.44392	41.1486	1.05706	0.109421
19032024	V3	30B8	0.1	6.14742	41.1486	1.05706	0.126968
29032024	V3	30B8	0.1	4.79094	43.5086	1.04992	0.0881095
29032024	V3	30B8	0.1	5.80353	43.5086	1.04992	0.111958
29032024	V3	30B8	0.1	5.23718	43.5086	1.04992	0.0986196
9042024	V3	30B8	0.1	4.07366	26.6609	1.01498	0.119266
9042024	V3	30B8	0.1	3.9757	26.6609	1.01498	0.115446
9042024	V3	30B8	0.1	3.55556	26.6609	1.01498	0.0990637
19032024	V3	30B8	1	4.22757	41.1486	1.05706	0.0790816
19032024	V3	30B8	1	4.12999	41.1486	1.05706	0.0766477
19032024	V3	30B8	1	4.10893	41.1486	1.05706	0.0761225
29032024	V3	30B8	1	5.47811	43.5086	1.04992	0.104294
29032024	V3	30B8	1	5.18972	43.5086	1.04992	0.0975017
29032024	V3	30B8	1	4.68215	43.5086	1.04992	0.0855472
9042024	V3	30B8	1	2.98923	26.6609	1.01498	0.0769809
9042024	V3	30B8	1	3.23682	26.6609	1.01498	0.086635
9042024	V3	30B8	1	2.94128	26.6609	1.01498	0.0751113
19032024	V4	No_Ab	0	39.6411	37.7672	1.05706	1.05105
19032024	V4	No_Ab	0	37.3904	37.7672	1.05706	0.989736
19032024	V4	No_Ab	0	36.2701	37.7672	1.05706	0.959218
29032024	V4	No_Ab	0	32.7129	25.8625	1.04992	1.27609
29032024	V4	No_Ab	0	26.9178	25.8625	1.04992	1.04253
29032024	V4	No_Ab	0	17.9567	25.8625	1.04992	0.681381
9042024	V4	No_Ab	0	27.0532	26.2826	1.01498	1.0305
9042024	V4	No_Ab	0	26.567	26.2826	1.01498	1.01126
9042024	V4	No_Ab	0	25.2275	26.2826	1.01498	0.958244
19032024	V4	30B8	0.001	38.3693	37.7672	1.05706	1.0164
19032024	V4	30B8	0.001	38.0192	37.7672	1.05706	1.00686
19032024	V4	30B8	0.001	32.0085	37.7672	1.05706	0.843129
29032024	V4	30B8	0.001	24.2466	25.8625	1.04992	0.934877
29032024	V4	30B8	0.001	25.3391	25.8625	1.04992	0.978907
29032024	V4	30B8	0.001	15.39	25.8625	1.04992	0.577937
9042024	V4	30B8	0.001	21.5216	26.2826	1.01498	0.81158
9042024	V4	30B8	0.001	21.6168	26.2826	1.01498	0.815347
9042024	V4	30B8	0.001	19.4086	26.2826	1.01498	0.727955
19032024	V4	30B8	0.01	31.7471	37.7672	1.05706	0.83601
19032024	V4	30B8	0.01	26.6544	37.7672	1.05706	0.697284
19032024	V4	30B8	0.01	22.7165	37.7672	1.05706	0.590012
29032024	V4	30B8	0.01	15.5918	25.8625	1.04992	0.586069
29032024	V4	30B8	0.01	13.4311	25.8625	1.04992	0.498988
29032024	V4	30B8	0.01	11.4976	25.8625	1.04992	0.421065
9042024	V4	30B8	0.01	13.295	26.2826	1.01498	0.486
9042024	V4	30B8	0.01	13.7123	26.2826	1.01498	0.502514
9042024	V4	30B8	0.01	13.8101	26.2826	1.01498	0.506387
19032024	V4	30B8	0.1	4.82563	37.7672	1.05706	0.102657
19032024	V4	30B8	0.1	5.69349	37.7672	1.05706	0.126298
19032024	V4	30B8	0.1	5.09562	37.7672	1.05706	0.110012
29032024	V4	30B8	0.1	4.91832	25.8625	1.04992	0.155905
29032024	V4	30B8	0.1	5.12014	25.8625	1.04992	0.164039
29032024	V4	30B8	0.1	5.85078	25.8625	1.04992	0.193485
9042024	V4	30B8	0.1	3.65249	26.2826	1.01498	0.104383
9042024	V4	30B8	0.1	4.17297	26.2826	1.01498	0.124982
9042024	V4	30B8	0.1	3.57236	26.2826	1.01498	0.101212
19032024	V4	30B8	1	4.35711	37.7672	1.05706	0.0898948
19032024	V4	30B8	1	4.27931	37.7672	1.05706	0.0877754
19032024	V4	30B8	1	3.99177	37.7672	1.05706	0.0799427
29032024	V4	30B8	1	4.97575	25.8625	1.04992	0.158219
29032024	V4	30B8	1	4.59064	25.8625	1.04992	0.142698
29032024	V4	30B8	1	3.43886	25.8625	1.04992	0.0962794
9042024	V4	30B8	1	3.42344	26.2826	1.01498	0.095318
9042024	V4	30B8	1	4.00983	26.2826	1.01498	0.118525
9042024	V4	30B8	1	3.8128	26.2826	1.01498	0.110728
19032024	V5	No_Ab	0	39.6369	39.4401	1.05706	1.00513
19032024	V5	No_Ab	0	38.804	39.4401	1.05706	0.983427
19032024	V5	No_Ab	0	39.8794	39.4401	1.05706	1.01145
29032024	V5	No_Ab	0	41.9973	42.3451	1.04992	0.991579
29032024	V5	No_Ab	0	45.2614	42.3451	1.04992	1.07062
29032024	V5	No_Ab	0	39.7765	42.3451	1.04992	0.9378
9042024	V5	No_Ab	0	25.1592	26.0146	1.01498	0.965783
9042024	V5	No_Ab	0	26.3671	26.0146	1.01498	1.0141
9042024	V5	No_Ab	0	26.5175	26.0146	1.01498	1.02012
19032024	V5	30B8	0.001	38.3862	39.4401	1.05706	0.972543
19032024	V5	30B8	0.001	37.1112	39.4401	1.05706	0.939326
19032024	V5	30B8	0.001	37.5147	39.4401	1.05706	0.949837
29032024	V5	30B8	0.001	34.1772	42.3451	1.04992	0.802207
29032024	V5	30B8	0.001	33.7329	42.3451	1.04992	0.791448
29032024	V5	30B8	0.001	34.2153	42.3451	1.04992	0.803131
9042024	V5	30B8	0.001	21.8407	26.0146	1.01498	0.83304
9042024	V5	30B8	0.001	21.9456	26.0146	1.01498	0.837239
9042024	V5	30B8	0.001	21.4249	26.0146	1.01498	0.81641
19032024	V5	30B8	0.01	26.2833	39.4401	1.05706	0.657222
19032024	V5	30B8	0.01	24.8373	39.4401	1.05706	0.619549
19032024	V5	30B8	0.01	26.7988	39.4401	1.05706	0.670653
29032024	V5	30B8	0.01	20.8628	42.3451	1.04992	0.479786
29032024	V5	30B8	0.01	19.8968	42.3451	1.04992	0.456394
29032024	V5	30B8	0.01	19.6788	42.3451	1.04992	0.451116
9042024	V5	30B8	0.01	11.9993	26.0146	1.01498	0.439378
9042024	V5	30B8	0.01	12.213	26.0146	1.01498	0.447929
9042024	V5	30B8	0.01	11.4645	26.0146	1.01498	0.417985
19032024	V5	30B8	0.1	5.4911	39.4401	1.05706	0.115521
19032024	V5	30B8	0.1	5.28862	39.4401	1.05706	0.110246
19032024	V5	30B8	0.1	5.44015	39.4401	1.05706	0.114193
29032024	V5	30B8	0.1	6.98599	42.3451	1.04992	0.143747
29032024	V5	30B8	0.1	6.86451	42.3451	1.04992	0.140805
29032024	V5	30B8	0.1	6.91475	42.3451	1.04992	0.142022
9042024	V5	30B8	0.1	3.99352	26.0146	1.01498	0.119143
9042024	V5	30B8	0.1	3.73113	26.0146	1.01498	0.108648
9042024	V5	30B8	0.1	3.95401	26.0146	1.01498	0.117563
19032024	V5	30B8	1	4.13724	39.4401	1.05706	0.0802484
19032024	V5	30B8	1	4.1647	39.4401	1.05706	0.0809637
19032024	V5	30B8	1	4.20548	39.4401	1.05706	0.0820262
29032024	V5	30B8	1	4.40971	42.3451	1.04992	0.0813602
29032024	V5	30B8	1	5.17862	42.3451	1.04992	0.0999801
29032024	V5	30B8	1	4.72809	42.3451	1.04992	0.0890701
9042024	V5	30B8	1	2.84769	26.0146	1.01498	0.0733093
9042024	V5	30B8	1	3.06655	26.0146	1.01498	0.082064
9042024	V5	30B8	1	2.84512	26.0146	1.01498	0.0732066
