# Supplementary material for: Neutralizing human monoclonal antibodies that target the PcrV component of the type III secretion system of Pseudomonas aeruginosa act through distinct mechanisms
Source: eLife. 2026 Feb 17;14:RP105195. doi: 10.7554/eLife.105195 (PMC12912723; doi:10.7554/eLife.105195)
Supplement: Source data 1. [file elife-105195-data1.xlsx]

## Sheet: S3P1D8
Non biot competitor antibody (µg/ml)	S3P1D8	S3P1B7	S4P5D5	S4P3G6	S4P5G10	S3P1D6	S3P1B4	S3P1D5	VRCO1
50	0.8686	2.3191	2.215	2.2929	2.1916	1.9692	2.2073	2.2103	2.1515
10	0.8746	0.8393	2.1364	2.217	2.3097	2.0727	2.1645	2.1011	2.1555
2	0.873	2.1636	2.2541	2.191	2.1724	2.0648	2.1133	2.0414	2.1457
0.4	0.9114	2.3023	2.1968	2.2236	2.1887	2.1216	2.0231	2.1656	2.0847
0.08	0.9679	2.1804	2.2826	2.3018	2.182	2.1762	2.1337	2.1751	2.1574
0.016	1.5483	2.3649	2.3416	2.3661	2.2534	2.1285	2.1402	2.2015	2.2105
0.0032	1.5031	1.6147	1.65	1.6463	1.5406	1.6516	1.6872	1.5137	1.7362
0.00064	2.3338	2.3463	2.4809	2.4538	2.378	2.3172	2.2187	2.2427	2.0929

## Sheet: S3P1B7
Non biot competitor antibody (µg/ml)	S3P1D8	S3P1B7	S4P5D5	S4P3G6	S4P5G10	S3P1D6	S3P1B4	S3P1D5	VRCO1
50	2.1478	0.8165	0.8195	1.1883	2.2161	1.2428	1.0003	1.5882	1.9944
10	2.269	0.8946	1.0613	1.6506	2.104	1.6249	1.4163	1.5325	1.9247
2	1.9339	0.9563	1.4132	1.7085	1.9525	1.8174	1.6605	1.6495	1.9196
0.4	2.0299	1.4348	1.7831	2.1209	2.0411	1.8622	1.7794	1.8141	1.9019
0.08	2.1553	2.0303	2.0233	1.9366	1.8905	1.9548	1.7929	1.9217	1.9379
0.016	2.2488	2.0065	2.2712	2.1456	2.1373	1.9455	1.9097	1.9011	1.864
0.0032	2.2529	2.1496	2.049	2.2549	2.0149	2.0899	1.8896	1.9134	1.8773
0.00064	2.1574	2.1263	2.2668	2.1914	2.1677	2.03	2.2864	2.2147	1.9441

## Sheet: S4P5D5
Non biot competitor antibody (µg/ml)	S3P1D8	S3P1B7	S4P5D5	S4P3G6	S4P5G10	S3P1D6	S3P1B4	S3P1D5	VRCO1
50	2.8416	0.8269	0.8525	1.0597	2.7431	1.0254	0.8724	1.5606	2.2328
10	2.8389	0.8556	0.9744	1.3885	2.6602	1.5563	1.2816	1.6169	2.4104
2	2.8384	0.9678	1.1936	2.1841	2.6046	1.9971	1.8116	1.7408	2.272
0.4	2.7315	1.2139	1.7466	2.5131	2.397	2.3051	2.2236	2.0456	2.1358
0.08	2.6551	2.4247	2.436	2.5222	2.4816	2.0528	2.2955	2.2423	2.1382
0.016	2.9959	2.7819	2.6692	2.753	2.4046	2.2784	2.3335	2.2008	2.0438
0.0032	2.7428	2.5446	2.7617	2.7384	2.6747	2.568	2.462	2.1921	2.2561
0.00064	2.9554	2.8689	2.7888	2.8558	2.7699	2.607	2.6543	2.7022	2.1232

## Sheet: S4P3G6
Non biot competitor antibody (µg/ml)	S3P1D8	S3P1B7	S4P5D5	S4P3G6	S4P5G10	S3P1D6	S3P1B4	S3P1D5	VRCO1
50	1.5314	0.5662	0.592	0.6929	1.3912	0.6867	0.6952	0.6687	1.1737
10	1.6092	0.6763	0.7001	0.8827	1.7911	0.8633	0.8691	0.7193	1.5687
2	2.0715	0.7379	0.8852	1.1384	1.7395	0.9791	1.3224	0.9359	1.5717
0.4	2.0244	0.8336	1.2447	1.5238	1.5151	1.4449	1.274	1.3523	1.5558
0.08	1.4231	1.4562	1.4598	1.4072	1.7819	1.6316	1.39	1.4863	1.5827
0.016	1.8727	2.2408	1.4538	1.2962	1.8179	1.5572	1.7802	1.5689	1.6778
0.0032	2.0969	1.6878	1.7607	1.432	1.8429	1.7346	1.9231	1.5837	1.7191
0.00064	1.5806	1.5931	1.7635	1.6355	1.5713	1.7432	1.6539	1.5694	1.7142

## Sheet: S4P5G10
Non biot competitor antibody (µg/ml)	S3P1D8	S3P1B7	S4P5D5	S4P3G6	S4P5G10	S3P1D6	S3P1B4	S3P1D5	VRCO1
50	1.1665	1.2521	1.2294	0.9374	0.6553	1.0456	0.9506	1.2092	1.2155
10	1.2116	1.1678	1.315	1.0721	0.6104	1.1305	1.0048	1.2272	1.02
2	1.3204	1.2545	1.0828	1.319	0.7043	1.2324	1.2331	1.1058	1.2238
0.4	1.1393	1.1037	1.2992	1.2125	0.65	1.0601	1.1969	1.1096	1.1723
0.08	1.434	1.3631	1.0492	1.0873	0.6591	1.2584	1.0237	1.3243	1.0137
0.016	1.4491	1.2634	1.1303	1.2684	1.0413	1.2028	1.2071	1.3214	1.2236
0.0032	1.3756	1.1204	1.0846	1.0267	1.0837	1.1292	1.07	1.0945	1.2315
0.00064	1.2177	1.1907	1.1593	1.1939	1.1483	1.1113	1.1304	1.1682	1.0987

## Sheet: S3P1D6
Non biot competitor antibody (µg/ml)	S3P1D8	S3P1B7	S4P5D5	S4P3G6	S4P5G10	S3P1D6	S3P1B4	S3P1D5	VRCO1
50	2.2078	0.7465	0.6557	1.5144	2.757	0.7469	1.0267	2.2708	2.5688
10	2.9119	0.9345	0.8367	1.5232	2.668	0.9715	1.785	1.6882	2.5807
2	2.5571	1.4377	1.228	2.2346	2.5556	1.7681	2.3262	1.8568	2.5709
0.4	2.7715	2.0207	1.7707	2.5136	2.3136	2.4825	2.5609	2.0439	2.2963
0.08	2.8523	2.3425	2.2682	2.6091	2.6718	2.5284	2.7739	2.7065	2.8311
0.016	2.5165	2.6236	2.7136	2.4282	2.3403	2.3981	2.4156	2.4265	2.7424
0.0032	2.6427	2.7922	2.5619	2.6063	2.5375	2.5909	2.959	2.6125	2.4993
0.00064	2.8457	3.0156	2.7856	2.715	2.7226	2.623	3.0177	2.735	3.0767

## Sheet: S3P1B4
Non biot competitor antibody (µg/ml)	S3P1D8	S3P1B7	S4P5D5	S4P3G6	S4P5G10	S3P1D6	S3P1B4	S3P1D5	VRCO1
50	2.68	0.6162	0.6857	1.4758	2.8256	0.8239	0.758	2.322	2.2763
10	2.4981	0.6989	0.7537	1.2621	2.356	1.1476	1.0157	1.2505	2.3025
2	2.5904	0.734	0.8824	2.0778	2.3074	1.624	1.8342	1.0431	2.5364
0.4	2.6138	1.0936	1.4868	2.5394	2.4828	2.6087	2.3969	1.7805	2.6666
0.08	2.7506	2.5473	2.422	2.5323	2.3325	2.3601	2.5483	2.1177	2.4257
0.016	2.9601	2.8182	2.6531	2.4602	2.4814	2.4172	2.5636	2.3351	2.5055
0.0032	2.8498	2.877	2.7224	2.7449	2.5712	2.5669	2.4334	2.3642	2.5541
0.00064	2.8163	2.4065	2.988	2.4606	2.3819	2.6482	2.6094	2.2846	2.6824

## Sheet: S3P1D5
Non biot competitor antibody (µg/ml)	S3P1D8	S3P1B7	S4P5D5	S4P3G6	S4P5G10	S3P1D6	S3P1B4	S3P1D5	VRCO1
50	3.0321	0.7252	0.7166	0.8544	3.2746	0.8433	0.7368	0.674	2.594
10	3.1436	0.7381	0.8575	1.6163	3.1883	1.5478	1.2821	0.8015	2.4205
2	3.1816	0.8438	1.7529	3.1753	3.0517	2.6437	2.848	1.6005	2.1787
0.4	3.1134	2.4117	2.7632	3.3231	3.2663	3.1587	3.2352	2.4355	2.498
0.08	3.325	3.2936	3.2007	3.2368	3.0952	2.9768	3.0003	2.6787	2.7699
0.016	3.3166	3.2698	3.0771	3.0889	3.2134	3.0726	3.1348	2.8653	2.8524
0.0032	3.2996	3.2919	3.187	3.3734	3.0666	3.2153	3.2055	2.962	3.0091
0.00064	3.3374	3.2988	3.2769	3.2473	3.0492	3.1364	3.1041	2.9582	2.9433

## Sheet: S1P3G9
Non biot competitor antibody (µg/ml)	S1P3G9	S4P3D6	S4P5B3	S4P5E10
50	4.15149	94.6656	100.42	107.978
10	5.48957	99.4249	98.5819	107.081
2	13.7435	94.8372	97.8516	104.949
0.4	109.527	96.4988	100.165	112.918
0.08	112.105	98.5868	98.7485	111.379
0.016	114.183	99.5719	96.7193	103.473
0.0032	105.454	99.3808	99.5278	100.964

## Sheet: S4P3D6
Non biot competitor antibody (µg/ml)	S1P3G9	S4P3D6	S4P5B3	S4P5E10
50	68.6787	3.75284	7.42995	84.0434
10	73.6726	4.74995	19.2985	85.3182
2	77.7494	10.0805	57.803	84.8091
0.4	75.6374	81.3382	101.167	82.5372
0.08	97.8894	101.293	106.994	83.9677
0.016	73.538	85.3392	109.918	86.2438
0.0032	77.6905	87.6069	86.8538	87.6616

[truncated: 2 more sheets: S4P5B3, S4P5E10]
