# Supplementary material for: Neutralizing human monoclonal antibodies that target the PcrV component of the type III secretion system of Pseudomonas aeruginosa act through distinct mechanisms
Source: eLife. 2026 Feb 17;14:RP105195. doi: 10.7554/eLife.105195 (PMC12912723; doi:10.7554/eLife.105195)
Supplement: Source data 2. [file elife-105195-data2.xlsx]

## Sheet: S4P5B3 
DATA FITTING	Binding Model	1:2 bivalent
	Fitting type	type	group
		group by	sample ID
		Rmax values	sensor (unlink)
	Results	Conc. (nM)	Response	KD (M)	KD Error	ka (1/Ms)	ka2	ka Error	ka2 Error	kdis (1/s)	kdis2	kdis Error	kdis2 Error	Rmax	Rmax Error	Full X^2	Full R^2
		3.12	0.2763	2.385e-11	7.308e-12	38900	1.314	225.7	0.01759	9.276e-07	0.3563	2.842e-07	0.01111	4.7936	0.0229	1.0083	0.9998
		6.25	0.46											3.7362	0.02
		12.5	0.7963											3.6119	0.0181
		25	1.2946											3.6251	0.0169
		50	1.6707											3.2176	0.0154
		100	2.0643											3.0506	0.0155
		200	2.4735											3.0378	0.0145
DATA FITTING	Binding Model	1:2 bivalent
	Fitting type	type	group
		group by	sample ID
		Rmax values	sensor (unlink)
	Results	Conc. (nM)	Response	KD (M)	KD Error	ka (1/Ms)	ka2	ka Error	ka2 Error	kdis (1/s)	kdis2	kdis Error	kdis2 Error	Rmax	Rmax Error	Full X^2	Full R^2
		3.12	0.2624	<1.0E-12	1.096e-11	33500	1.034	269.2	1.019	<1.0E-07	0.286	3.671e-07	0.2808	4.7121	0.0365	1.1447	0.9997
		6.25	0.4319											4.0268	0.0299
		12.5	0.7239											3.7008	0.0257
		25	1.2192											3.7674	0.0238
		50	1.4272											2.9292	0.0189
		100	1.721											2.6323	0.018
		200	2.0528											2.556	0.0165
								0.1907

## Sheet: S4P3D6
DATA FITTING	Binding Model	1:2 bivalent
	Fitting type	type	group
		group by	sample ID
		Rmax values	sensor (unlink)
	Results	Conc. (nM)	Response	KD (M)	KD Error	ka (1/Ms)	ka2	ka Error	ka2 Error	kdis (1/s)	kdis2	kdis Error	kdis2 Error	Rmax	Rmax Error	Full X^2	Full R^2
		3.12	0.7578	7.368e-10	1.374e-11	61690	0.2406	125.7	0.04394	4.545e-05	0.008085	8.426e-07	0.001244	7.9698	0.0156	4.4103	0.9996
		6.25	1.2927											7.415	0.0127
		12.5	2.1413											7.3081	0.0103
		25	2.8593											6.7837	0.0081
		50	3.2115											6.2766	0.0101
		100	3.3493											5.793	0.0137
		200	3.5141											5.4839	0.0157
DATA FITTING	Binding Model	1:2 bivalent
	Fitting type	type	group
		group by	sample ID
		Rmax values	sensor (unlink)
	Results	Conc. (nM)	Response	KD (M)	KD Error	ka (1/Ms)	ka2	ka Error	ka2 Error	kdis (1/s)	kdis2	kdis Error	kdis2 Error	Rmax	Rmax Error	Full X^2	Full R^2
		3.12	0.7527	7.63e-10	1.412e-11	61910	0.5777	114.7	0.2484	4.724e-05	0.01654	8.701e-07	0.006648	7.8439	0.0143	4.8079	0.9997
		6.25	1.2986											7.438	0.0116
		12.5	2.1933											7.4695	0.0094
		25	3.0405											7.2257	0.0074
		50	3.4573											6.7912	0.0093
		100	3.6695											6.444	0.013
		200	3.8542											6.1517	0.015
